1 **Parkin drives pS65-Ub turnover independently of canonical autophagy in**  
2 ***Drosophila***

3

4

5 Joanne L. Usher<sup>1,2</sup>, Juliette J. Lee<sup>2</sup>, Alvaro Sanchez-Martinez<sup>2</sup>, and Alexander J.  
6 Whitworth<sup>2</sup>

7

8

9 <sup>1</sup> PNAC Division, MRC Laboratory of Molecular Biology, Cambridge Biomedical  
10 Campus, Francis Crick Avenue, Cambridge, United Kingdom CB2 0QH

11 <sup>2</sup> MRC Mitochondrial Biology Unit, Keith Peters Building, Cambridge Biomedical  
12 Campus, Hills Rd, Cambridge, United Kingdom CB2 0XY

13

14

15 Correspondence to: A.J.W., email: [a.whitworth@mrc-mbu.cam.ac.uk](mailto:a.whitworth@mrc-mbu.cam.ac.uk)

## 29 Introduction

30

31 Parkinson's disease (PD) is the second most common neurodegenerative disease,  
32 with the global burden of disease having more than doubled between 1990 and 2016  
33 (GBD 2016 Parkinson's Disease Collaborators et al., 2018). Autosomal recessive  
34 mutations in the genes encoding the mitochondria-targeted kinase PINK1 and the E3  
35 ubiquitin (Ub) ligase Parkin are associated with parkinsonism (Kitada et al., 1998;  
36 Valente et al., 2004). Loss of either homolog in *Drosophila* (Pink1 and parkin,  
37 respectively) results in strikingly similar phenotypes of severe mitochondrial  
38 dysfunction and degeneration of the indirect flight muscles, as well as the  
39 degeneration of a subset of dopaminergic neurons, thus mimicking a key hallmark of  
40 PD (Greene et al., 2003; Whitworth et al., 2005; Clark et al., 2006; Park et al., 2006).  
41 Genetic interaction studies subsequently placed *Pink1* and *parkin* in a common  
42 pathway, with *parkin* downstream of *Pink1* (Clark et al., 2006).

43

44 The best-characterised PINK1 substrates are Ub and Parkin, each phosphorylated at  
45 their respective Ser65 residues (Kane et al., 2014; Kazlauskaitė et al., 2014; Koyano  
46 et al., 2014; Kondapalli et al., 2012; Shiba-Fukushima et al., 2012). PINK1 is partially  
47 imported into healthy mitochondria via its N-terminal mitochondrial targeting sequence  
48 where it is cleaved and degraded in the cytosol by the N-end rule pathway (Yamano  
49 and Youle, 2013). PINK1 is activated upon stalling on the outer mitochondrial  
50 membrane (OMM), where it phosphorylates Ub (pS65-Ub) that is conjugated at low  
51 abundance to OMM proteins (Okatsu et al., 2015a). Parkin exists in the cytosol in an  
52 autoinhibited state and is recruited to mitochondria by binding pS65-Ub (Okatsu et al.,  
53 2015b). pS65-Ub binding partially displaces Parkin's Ubl domain, which allows it to be  
54 phosphorylated by PINK1 (Gladkova et al., 2018). This second phosphorylation event  
55 results in a dramatic domain rearrangement that relieves Parkin's autoinhibitory  
56 contacts and allows it to ubiquitinate proteins in close proximity (Gladkova et al., 2018;  
57 Sauv   et al., 2018). The Ub provided by Parkin allows further phosphorylation by  
58 PINK1, which in turn promotes further Parkin recruitment, thus constituting a feed-  
59 forward mechanism of mitochondrial pS65-ubiquitination that is dependent on both  
60 PINK1 and Parkin (Ordureau et al., 2014). Both the structure of active Parkin and cell-

61 based studies suggest that Parkin has low substrate selectivity (Gladkova et al., 2018;  
62 Koyano et al., 2019), and it has been found to predominantly produce K6, K11, K48  
63 and K63 chains *in vitro* (Ordureau et al., 2014).

64

65 Much of our understanding of the function of PINK1 and Parkin utilised chemical  
66 depolarisation of mitochondria in cultured cells in conjunction with Parkin  
67 overexpression (Narendra et al., 2008; Vives-Bauza et al., 2010). These experiments  
68 established a paradigm in studying the PINK1-parkin pathway; upon depolarisation,  
69 PINK1- and Parkin-mediated ubiquitination of OMM proteins leads to the recruitment  
70 of the Ub-binding mitophagy receptors OPTN and NDP52 (Lazarou et al., 2015), which  
71 in turn promote autophagosome initiation (Yamano et al., 2020; Boyle et al., 2019),  
72 ultimately leading to degradation of the damaged mitochondria via the autophagy  
73 system. However, studies in animal models have provided mixed results as to the  
74 contribution of PINK1 and Parkin to mitophagy as measured by pH-sensitive  
75 fluorescent reporter constructs (Lee et al., 2018; Cornelissen et al., 2018; McWilliams  
76 et al., 2018; Kim et al., 2019; Liu et al., 2021). It has also been shown in cell culture  
77 models that treatment with Antimycin A or expression of an aggregation-prone matrix  
78 protein,  $\Delta$ OTC, neither of which cause mitochondrial depolarisation, led to the  
79 production of mitochondria-derived vesicles (MDVs) in a PINK1- and Parkin-  
80 dependent manner (McLelland et al., 2014; Burman et al., 2017). Other studies have  
81 focused on the role of PINK1 and Parkin in mitochondrial biogenesis, protein import,  
82 and in the regulation of the fission and fusion machinery (Stevens et al., 2015; Jacoupy  
83 et al., 2019; Poole et al., 2008). However, many questions remain about the  
84 mechanisms of PINK1-Parkin-mediated mitochondrial quality control *in vivo*.

85

86 We sought to determine the physiological mechanisms of the PINK1-parkin pathway  
87 by monitoring pS65-Ub levels as a direct measure of PINK1 activity. We developed  
88 complementary mass spectrometry, immunoblotting and immunostaining methods to  
89 detect pS65-Ub using *Drosophila* as a model system. We confirm that pS65-Ub  
90 production is Pink1-dependent and can therefore be utilised to follow activation of the  
91 Pink1-parkin pathway, and the downstream mechanisms of mitochondrial turnover, *in*  
92 *vivo*. We identify exposure to the oxidant and parkinsonian toxin paraquat as a potent

93 activator of the Pink1-parkin pathway, and establish this approach as a new paradigm  
94 to study the Pink1-parkin pathway *in vivo*.

95

## 96 **Results**

97

### 98 **Development of methods to detect pS65-Ub *in vivo***

99 To understand the role of the Pink1-parkin pathway in maintaining mitochondrial  
100 quality control *in vivo*, we developed methods to detect pS65-Ub at low abundances  
101 by mass spectrometry. Using a sample preparation pipeline based on the recently  
102 described Ub-Clipping method (Swatek et al., 2019), we determined the absolute  
103 abundance of total Ub and pS65-Ub in mitochondrial extracts from young (2-3 days)  
104 and aged (50 to 60 days) flies from a wild-type background ( $w^{1118}$ ). In young flies, Ub  
105 was present on mitochondria, but pS65-Ub was not reliably detected with this method  
106 (Figure 1A). In contrast, aged flies displayed elevated total mitochondrial Ub, and we  
107 were able to robustly detect pS65-Ub (Figure 1A). To gain a clearer insight into the  
108 basal levels of pS65-Ub in young wild type animals, we adjusted our approach in order  
109 to optimise pS65-Ub detection (see Methods). Using this method we were indeed able  
110 to detect pS65-Ub in mitochondrial fractions from young flies (Figure 1B), thus  
111 confirming that pS65-Ub is present in young flies at very low abundance.

112

113 We next sought to identify *in vivo* stimuli of the Pink1-parkin pathway. Mitochondrial  
114 stress induced by a mtDNA mutator model ( $daG4>mito-APOBEC1$ ) (Andreazza et al.,  
115 2019) was sufficient to induce pS65-Ub in young flies (Figure 1A). We then tested  
116 paraquat, an oxidant that has been epidemiologically linked to PD (Tanner et al.,  
117 2011). In striking contrast to the ageing and mutator models, exposure to paraquat led  
118 to a robust increase in both total and pS65-Ub in mitochondrial fractions (Figure 1A).  
119 In paraquat-treated flies, pS65-Ub comprised approximately 6% of the total  
120 mitochondrial Ub, substantially less than the 10-30% Ub phosphorylation that has  
121 been observed using similar methods in depolarised cells (Ordureau et al., 2014;  
122 Swatek et al., 2019).

123

124 As an orthogonal validation of our mass spectrometry results, we evaluated  
125 immunodetection methods using an antibody recently characterised to specifically  
126 detect pS65-Ub at the femtomolar to picomolar range (Watzlawik et al., 2020).  
127 Immunoblotting confirmed the robust induction of pS65-Ub and total mitochondrial Ub  
128 in response to paraquat, while pS65-Ub was not detected in response to amino acid  
129 starvation from a sucrose-only diet (Figure 1C). The paraquat-induced pS65-Ub co-  
130 enriched with mitochondria in sub-cellular fractions (Figure 1D). Interestingly, pS65-  
131 Ub levels appeared to be greater in heads compared with bodies (thorax and  
132 abdomens) (Figure 1E). We also determined that removal of paraquat led to a  
133 reduction in pS65-Ub levels, presumably due to mitochondrial turnover  
134 (Supplementary Figure 1A). Immunofluorescence microscopy of the flight muscles of  
135 aged flies revealed low but consistent detection of mitochondria (ATP5A-positive) that  
136 were enveloped in pS65-Ub (Figure 1F), while pS65-Ub-positive structures were rarely  
137 observed in young flies (Supplementary Figure 2A). These results suggest that the  
138 Pink1-parkin pathway is basally active in *Drosophila*, but that pS65-Ub levels are likely  
139 kept very low in young animals due to efficient turnover.

140

#### 141 **pS65-Ub production in response to paraquat requires Pink1 but not parkin**

142 We next sought to confirm the requirements for Pink1 and parkin in the ubiquitination  
143 of mitochondria under basal and paraquat-induced conditions. To this end, we  
144 determined the abundance of total Ub and pS65-Ub in mitochondrial extracts from  
145 wild-type, *Pink1*<sup>-</sup> (*Pink1*<sup>B9</sup>), and *park*<sup>-/-</sup> (*park*<sup>25</sup>) mutant flies by mass spectrometry.  
146 Under basal conditions, loss of Pink1 resulted in elevated total Ub levels that did not  
147 further increase upon exposure to paraquat (Figure 2A). Importantly, pS65-Ub levels  
148 did not increase above background even upon exposure to paraquat in *Pink1*<sup>-</sup> flies  
149 (Figure 2B, Supplementary Figure 1B), confirming the conserved and essential role of  
150 Pink1 in the phosphorylation of Ub at Ser65 in *Drosophila*. *park*<sup>-/-</sup> flies displayed  
151 modestly elevated total mitochondrial Ub that did not significantly increase in response  
152 to paraquat (Figure 2A). In contrast, the increase in pS65-Ub levels observed upon  
153 exposure to paraquat was, surprisingly, largely unaffected by loss of parkin (Figure  
154 2B).

155

156 As an intermediate product in the Pink1-parkin pathway, pS65-Ub levels will be  
157 affected by the kinetics of both its production and downstream turnover, both of which  
158 could be impacted by loss of parkin. Immunoblotting analysis of mitochondrial fractions  
159 after 3 days of paraquat exposure did not result in dramatic differences in pS65-Ub  
160 levels either upon loss of parkin (*park<sup>-/-</sup>*) or transgenic overexpression (*daG4>UAS-*  
161 *park*) (Supplementary Figure 1C). We therefore devised a paraquat pulse-chase assay  
162 to probe the effect of loss of parkin on pS65-Ub dynamics. Flies were exposed to  
163 paraquat for one day and then kept under normal conditions (i.e., no paraquat) before  
164 being analysed for pS65-Ub levels by immunoblotting. At early time points, pS65-Ub  
165 levels were reduced in *park<sup>-/-</sup>* mitochondria compared with mitochondria from wild-  
166 type animals (Figure 2C, D), consistent with a diminished feed-forward cycle of Pink1-  
167 parkin-dependent pS65-Ub production as previously described (Ordureau et al.,  
168 2014). In contrast, at later time points, pS65-Ub levels were elevated in *park<sup>-/-</sup>*  
169 mitochondria compared with wild-type flies, which likely reflects a defect in turnover of  
170 damaged mitochondria (Figure 2C, D). It is therefore likely that parkin participates in  
171 the feed-forward cycle to promote further parkin recruitment to damaged mitochondria,  
172 but is not strictly required for the production of pS65-Ub on mitochondria in response  
173 to paraquat.

174  
175 We next sought to interrogate the pattern of paraquat-stimulated mitochondrial  
176 ubiquitination in the presence and absence of Pink1 or parkin. Analysing the four Ub  
177 chain types (linked at K6, K11, K48 and K63) that are most abundant on depolarised  
178 mitochondria and produced by Parkin *in vitro* (Ordureau et al., 2014), the relative  
179 proportions of all four chain types were unchanged in mitochondria from *Pink1<sup>-</sup>* and  
180 *park<sup>-/-</sup>* flies compared to wild-type animals in basal conditions (Figure 2E-H). In  
181 response to paraquat, only K6 chains increased in abundance on wild-type  
182 mitochondria, while K11 chains remained unchanged. Surprisingly, K48 and K63  
183 chains decreased as a proportion of the total mitochondrial Ub, presumably due to a  
184 more substantial increase in monoubiquitination as previously described (Swatek et  
185 al., 2019). The paraquat-induced increase in K6 chains appeared to depend on Pink1  
186 and parkin, although we note a trend towards increasing K6 levels in these mutants  
187 (Figure 2E). Our results are therefore consistent with other reports that the molecular

188 function of parkin, rather than to amplify pS65-Ub, may be to produce either K6 chains  
189 or another Ub signal on the OMM following recruitment to damaged mitochondria by  
190 binding to pS65-Ub (Ordureau et al., 2015; Gersch et al., 2017).

191

### 192 ***parkin*-null flies have elevated basal pS65-Ub**

193 In our initial pipeline for detection of pS65-Ub, we enriched mitochondria by differential  
194 centrifugation. The pS65-Ub levels of untreated *park*<sup>-/-</sup> flies were not substantially  
195 elevated in these fractions, as determined by mass spectrometry (Figure 2B) and  
196 immunoblotting (Supplementary Figure 1C). However, when we analysed whole cell  
197 lysates, untreated *park*<sup>-/-</sup> animals displayed a striking abundance of pS65-Ub that was  
198 readily detectable by immunoblotting (Figure 3A). We confirmed that this signal  
199 represented pS65-Ub as it was sensitive to treatment with the deubiquitinase USP2  
200 (Supplementary Figure 1D). The effect was also observed upon ubiquitous knockdown  
201 of *parkin* (*daG4>UAS-park RNAi*), confirming the specificity of the effect for loss of  
202 parkin (Figure 3B). The inducible RNAi line allowed us to assess the tissue distribution  
203 of the pS65-Ub in these flies using tissue-specific drivers. Interestingly, here we found  
204 that the majority of the pS65-Ub originated from the muscle rather than neurons  
205 (Figure 3B). This contrasts with the pS65-Ub produced upon response to paraquat in  
206 wild-type flies, where it was enriched in heads (Figure 1E). However, when we  
207 enriched for neural tissues by harvesting heads, some pS65-Ub was detectable in  
208 *park*<sup>-/-</sup> flies (Figure 3C).

209

210 To better understand the subcellular localisation of pS65-Ub in *park*<sup>-/-</sup> flies we initially  
211 performed biochemical fractionation experiments. These results suggested that pS65-  
212 Ub localises to cellular membranes as opposed to the cytosol in *park*<sup>-/-</sup> flies  
213 (Supplementary Figure 1D). We next employed an immunostaining approach, and  
214 noted the formation of heterogeneous pS65-Ub-positive structures in the flight  
215 muscles of *park*<sup>-/-</sup> flies that were absent in wild-type and *Pink1*<sup>-</sup> flight muscles (Figure  
216 3D, Supplementary Figure 2A). These ranged from small punctate structures (<1 μm<sup>3</sup>)  
217 to very large objects that resembled hyperfused mitochondria but were mostly  
218 depleted for the mitochondrial marker ATP5A (Figure 3D). pS65-Ub staining appeared  
219 to show a greater degree of colocalization with an OMM-GFP marker than the inner

220 mitochondrial membrane (IMM) protein ATP5A (Figure 3D, Supplementary Figure 2B).  
221 These structures clearly colocalised with a total Ub marker (Figure 3E) and were  
222 absent in *Pink1*<sup>-</sup> flight muscles despite the presence of similar structures that stained  
223 for total Ub (Supplementary Figure 2C), confirming them as *bone fide* pS65-Ub. These  
224 results suggest that pS65-Ub accumulates on the OMM of dysfunctional mitochondria  
225 in the absence of parkin.

226

### 227 **Loss of core autophagy genes minimally affects pS65-Ub accumulation**

228 The striking increase in pS65-Ub levels in *park*<sup>-/-</sup> flies (Figure 3) indicated that turnover  
229 of pS65-Ub was disrupted, which presents a paradigm to investigate the turnover  
230 mechanisms downstream of Pink1 and parkin. Given the abundant evidence in cell  
231 culture models that PINK1-Parkin mediated turnover occurs via the canonical  
232 autophagy machinery (Lazarou et al., 2015; Nguyen et al., 2016), we analysed pS65-  
233 Ub levels in mutants of core autophagy genes, *Atg1* (homologue of ULK1), *Atg5* and  
234 *Atg8a* (homologue of LC3/GABARAP). We saw a modest age-related increase in  
235 pS65-Ub levels in *Atg5*<sup>-</sup> (*Atg5*<sup>5cc5</sup>) flies compared with wild-type animals  
236 (Supplementary Figure 3A), but surprisingly, this was very low compared to the  
237 increase in pS65-Ub levels observed in *park*<sup>-/-</sup> flies (Figure 4A). Consistent with this,  
238 neither loss of *Atg1* (*daG4>Atg1 RNAi*) nor *Atg8a*<sup>-</sup> (*Atg8a*<sup>KG07569</sup>) led to the same  
239 dramatic increase in pS65-Ub levels as loss of *park* (Figure 4B, Supplementary Figure  
240 3B).

241

242 Loss of parkin led to pS65-Ub production that was readily detectable by  
243 immunoblotting as early as the larval stage of development (Supplementary Figure  
244 3B). To further probe whether the canonical autophagy machinery affects pS65-Ub  
245 production, we quantified the size and number of pS65-Ub-positive puncta in larval  
246 muscle. Wild-type and *Pink1*<sup>-</sup> larvae displayed no pS65-Ub puncta (Figure 5A, B, H),  
247 consistent with the absence of pS65-Ub observed by immunoblotting (Supplementary  
248 Figure 3B). In contrast, *park*<sup>-/-</sup> tissues displayed abundant pS65-Ub puncta (Figure  
249 5C, H). *Atg5*<sup>-</sup> and *Atg8a*<sup>-</sup> larvae also displayed pS65-Ub puncta, although they were  
250 markedly fewer and generally smaller than those present upon loss of parkin (Figure  
251 5D, E, H, I), while *Atg5*<sup>-</sup>; *park*<sup>-/-</sup> and *Atg8a*<sup>-</sup>; *park*<sup>-/-</sup> double mutants displayed puncta



252 similar in number and size to *park*<sup>-/-</sup> alone (Figure 5F-I). These results suggest that  
253 canonical autophagy minimally contributes to the turnover of pS65-Ub-positive  
254 structures. Notably, while *park*<sup>-/-</sup>, *Atg5*<sup>-</sup> and *Atg8a*<sup>-</sup> animals are viable to adult stage,  
255 *Atg5*<sup>-</sup>; *park*<sup>-/-</sup> and *Atg8a*<sup>-</sup>; *park*<sup>-/-</sup> double mutants are generally non-viable past the  
256 pupal stage, with only a few rare escapers, indicating synthetic lethality from the  
257 combined effect of independent pathways.

258

### 259 **parkin overexpression reduces pS65-Ub levels in the absence of Atg5**

260 Although loss of the core autophagy components Atg1, Atg5 and Atg8a did not result  
261 in the same extent of pS65-Ub accumulation as loss of parkin, loss of Atg5 or Atg8a  
262 did lead to modestly increased pS65-Ub levels compared with wild-type animals  
263 (Supplementary Figure 3A, and Figure 5H). In addition, in the paraquat pulse-chase  
264 assay *Atg5*<sup>-</sup> flies had elevated pS65-Ub at later time points relative to wild-type flies,  
265 suggestive of a block in turnover (Supplementary Figure 3C, D). These results are  
266 consistent with the autophagy machinery contributing to turnover of damaged  
267 mitochondria.

268

269 In order to further dissect whether the parkin-mediated pS65-Ub turnover is  
270 autophagy-dependent, we investigated the effect of parkin overexpression in an *Atg5*<sup>-</sup>  
271 null background (*Atg5*<sup>5cc5</sup>; *daG4>UAS-park*). We hypothesised that, if the Pink1-parkin  
272 pathway proceeds primarily via autophagy, then parkin overexpression should either  
273 not affect or perhaps even further increase pS65-Ub levels in an *Atg5*<sup>-</sup> background. In  
274 contrast, if parkin drives autophagy-independent turnover, its overexpression should  
275 reduce pS65-Ub levels even in the absence of Atg5. We found in the paraquat pulse-  
276 chase assay that parkin overexpression substantially reduced pS65-Ub levels in an  
277 *Atg5*<sup>-</sup> background relative to an *Atg5*<sup>-</sup> mutant control (*Atg5*<sup>5cc5</sup>; *daG4>UAS-mito-HA-*  
278 *GFP*) (Figure 6A, B). We further confirmed by mass spectrometry that while  
279 mitochondria from *Atg5*<sup>-</sup> flies displayed modestly elevated pS65-Ub levels, this could  
280 be reduced upon overexpression of parkin (Figure 6C). Taken together, these results  
281 indicate that parkin is able to drive pS65-Ub turnover independently of the canonical  
282 autophagy machinery in *Drosophila*.

283

## 284 Discussion

285

286 We have optimised mass spectrometry and immunodetection methods to monitor  
287 physiological levels of pS65-Ub as a direct and specific readout of Pink1 activity in  
288 *Drosophila*, a preeminent model for dissecting the conserved functions of Pink1 and  
289 parkin. We have found that pS65-Ub is produced by Pink1 under basal conditions,  
290 albeit at very low levels. Our methods revealed that ~0.5% of total Ub on mitochondria  
291 from aged flies is Ser65-phosphorylated, and we further observed individual  
292 mitochondria that were enveloped in pS65-Ub. Although we could not reliably detect  
293 pS65-Ub in young flies without additional enrichment, we surmise that it is likely less  
294 than 0.1% of mitochondrial Ub. This suggests that under normal healthy conditions, in  
295 the absence of exogenous or accumulated endogenous stresses, Pink1 activation is  
296 either an extremely infrequent event or the pS65-Ub is very quickly degraded. This  
297 goes some way to explain why there was such negligible impact of loss of Pink1 or  
298 parkin on mitophagy reporters (Lee et al., 2018; McWilliams et al., 2018).

299

300 We also discovered that loss of parkin in *Drosophila* led to a striking increase in pS65-  
301 Ub levels in the absence of exogenous stimulation of the pathway. This surprising  
302 finding indicates that pS65-Ub alone is insufficient to elicit mitochondrial turnover, and  
303 therefore that parkin's molecular function is not simply to amplify the pS65-Ub signal  
304 produced by Pink1. Several earlier studies also support this conclusion: increased  
305 stoichiometry of mitochondrial Ub phosphorylation was found to be inhibitory to  
306 mitophagy receptor recruitment in cell culture studies (Ordureau et al., 2018), and *in*  
307 *vitro* binding studies using Ser65-phosphorylated Ub chains have found that Ub  
308 phosphorylation does not promote autophagy receptor binding (Ordureau et al., 2015;  
309 Heo et al., 2015). Indeed, to our knowledge, Parkin itself is the only protein that has  
310 been shown to bind preferentially to pS65-Ub (Wauer et al., 2015). Our findings  
311 therefore suggest that the function of pS65-Ub is primarily to recruit parkin to damaged  
312 mitochondria, rather than to promote downstream organelle turnover.

313

314 What then is the molecular role of parkin? This study did not investigate the specific  
315 substrates that are ubiquitinated by parkin, as previous studies have found a breadth

316 of OMM substrates ubiquitinated *in vivo* and in cell culture studies in a parkin-  
317 dependent manner (Martinez et al., 2017; Ordureau et al., 2018, 2020). We did,  
318 however, investigate the four main Ub chain types that are known to be produced by  
319 parkin – K6, K11, K48 and K63 (Ordureau et al., 2014) – and found that K6 chains,  
320 but not any other chain type, increased in relative abundance in mitochondrial fractions  
321 upon exposure to paraquat in a manner that was dependent on both Pink1 and parkin.  
322 This result was particularly interesting given that the only mitochondria-resident  
323 deubiquitinase, USP30, preferentially binds K6 chains (Cunningham et al., 2015;  
324 Wauer et al., 2015; Gersch et al., 2017; Sato et al., 2017). It is therefore possible that  
325 the primary function of parkin on mitochondria is to produce K6 chains. However, the  
326 functions of K6 chains are not fully understood (Swatek and Komander, 2016); further  
327 work is required to elucidate the precise contribution of this atypical Ub chain type to  
328 mitochondrial quality control.

329

330 The dramatic increase in pS65-Ub levels upon loss of parkin allowed us to assess the  
331 machinery responsible for downstream turnover of pS65-ubiquitinated mitochondria.  
332 Analysing the autophagy machinery, we observed that upon loss of the core  
333 autophagy components Atg1, Atg5 and Atg8a, pS65-Ub levels were not affected  
334 nearly to the extent observed in *park<sup>-/-</sup>* flies, which suggested that pS65-Ub is not  
335 primarily turned over via canonical autophagy. Moreover, parkin overexpression was  
336 able to reduce both basal and paraquat-induced pS65-Ub levels in an *Atg5<sup>-</sup>*  
337 background. These results add to the growing evidence that the Pink1-parkin pathway  
338 may, under more physiological conditions, promote turnover of damaged  
339 mitochondrial components in an autophagy-independent manner. For instance,  
340 Vincow et al. analysed turnover rates of mitochondrial proteins in *Drosophila* and found  
341 that Pink1 and parkin were required for the turnover of a subset of IMM proteins that  
342 was distinct from those turned over by the core autophagy protein Atg7 (Vincow et al.,  
343 2013). The authors also found some overlap between the proteins turned over by  
344 parkin and Atg7, and we observed a slight accumulation of pS65-Ub in autophagy-  
345 deficient flies, consistent with Pink1-parkin mediated degradation occurring partially  
346 via a classic autophagy route. However, the Pink1-parkin pathway clearly has roles  
347 that are divergent from canonical autophagy, as *Atg5<sup>-</sup>*; *park<sup>-/-</sup>* and *Atg8a<sup>-</sup>*; *park<sup>-/-</sup>*

348 double mutants showed synthetic lethality, and parkin overexpression was able to  
349 reduce both basal and paraquat-induced pS65-Ub levels in an *Atg5*<sup>-</sup> background.  
350 Consistent with this, the ability of parkin overexpression to rescue *Pink1* phenotypes  
351 has been shown to be unaffected by loss of Atg1 or Atg18 (Liu and Lu, 2010).

352  
353 One alternative mechanism of pS65-Ub turnover that is promoted by parkin could be  
354 direct proteasomal degradation of pS65-ubiquitinated OMM proteins (Tanaka et al.,  
355 2010; McLelland et al., 2018). Alternatively, growing evidence points to the existence  
356 of MDVs, defined as small (~100 nm) cargo-selective vesicles that form independently  
357 of the autophagy machinery (Sugiura et al., 2014). Multiple studies have described a  
358 role for Pink1 and parkin in the formation of a subset of these vesicles that are  
359 delivered to lysosomes (McLelland et al., 2014; Ryan et al., 2020). However, *in vivo*  
360 evidence for the existence of MDVs is limited, due in part to technical constraints in  
361 observing such small structures in complex tissues. We anticipate that the methods  
362 described herein could aid in validating the presence of MDVs and their dependence  
363 on Pink1 and parkin *in vivo*, or conversely whether parkin primarily drives turnover of  
364 pS65-ubiquitinated proteins in a proteasome-dependent manner.

365

### 366 **pS65-Ub as a biomarker for neurodegeneration**

367 Exposure to sub-lethal doses of paraquat led to a strong induction of pS65-Ub  
368 production in *Drosophila*. This result supports a link between PD caused by  
369 environmental exposure to mitochondrial toxins (Tanner et al., 2011) and genetic  
370 parkinsonism caused by loss of *PINK1* and *PRKN* gene function (Valente et al., 2004;  
371 Kitada et al., 1998). pS65-Ub has been proposed as a potential biomarker for  
372 neurodegenerative disease, with a recent study finding elevated pS65-Ub levels in  
373 blood samples from a cohort of Alzheimer's Disease patients compared with age-  
374 matched controls (Watzlawik et al., 2020). The cellular pathology underlying PD  
375 precedes classical symptom onset and therefore clinical diagnosis by many years,  
376 which is likely to hamper the success of clinical trials of potentially disease-modifying  
377 drugs as they may be given too late to halt disease progression (Stern et al., 2012). It  
378 is therefore of vital importance to identify patients as early in their disease progression  
379 as possible. We found that pS65-Ub was readily detectable in *park*<sup>-/-</sup> animals in

380 developmental stages prior to overt neurodegeneration, thereby suggesting that pS65-  
381 Ub accumulation is an early event that, if replicated in mammals, could have potential  
382 as an early-stage diagnostic biomarker. However, pS65-Ub levels increased with  
383 healthy ageing and was absent upon loss of Pink1, so we posit that a healthy range  
384 of pS65-Ub abundance would need to be established in order for pS65-Ub levels to  
385 be useful as a clinical PD diagnostic tool.

386

## 387 **Conclusions**

388 We have developed methods to detect pS65-Ub at physiological levels in *Drosophila*,  
389 and delivered the unanticipated finding that loss of parkin results in a striking elevation  
390 in pS65-Ub levels that is not recapitulated upon loss of the canonical autophagy genes  
391 *Atg5*, *Atg8a* or *Atg1*. We expect that the tools described herein will greatly aid in future  
392 studies dissecting the downstream mechanisms of mitochondrial turnover that are  
393 promoted by Pink1 and parkin *in vivo*.

394

## 395 **Materials and Methods**

396

### 397 ***Drosophila* stocks and husbandry**

398 Flies were raised under standard conditions in a temperature-controlled incubator with  
399 a 12h:12h light:dark cycle at 25 °C and 65 % relative humidity, on food consisting of  
400 agar, cornmeal, molasses, propionic acid and yeast. The following strains were  
401 obtained from the Bloomington *Drosophila* Stock Centre (RRID:SCR\_006457): *w*<sup>1118</sup>  
402 (RRID: BDSC\_6326), *da-GAL4* (RRID: BDSC\_55850), *Mef2-GAL4* (RRID:  
403 BDSC\_27390), *nSyb-GAL4* (RRID: BDSC\_51941), *Atg8a*<sup>KG07569</sup> (RRID:  
404 BDSC\_14639), *UAS-mito-HA-GFP* (RRID: BDSC\_8443) and *UAS-park RNAi* (RRID:  
405 BDSC\_38333). The *UAS-Atg1 RNAi* (VDRC\_16133) line was obtained from the  
406 Vienna *Drosophila* Resource Centre. *Pink1*<sup>B9</sup> flies were a kind gift of J. Chung (Park  
407 et al., 2006), and the *Atg5*<sup>5cc5</sup> stock was a kind gift of G. Juhasz (Kim et al., 2016).  
408 *UAS-parkc2*, *park*<sup>25</sup>, *UAS-mito-APOBEC1* and *UAS-mitoQC* lines have been  
409 described previously (Greene et al., 2003; Andreatza et al., 2019; Lee et al., 2018).  
410 Male flies only were used for experiments in adults, while experiments in larvae used  
411 both males and females except animals with X chromosome balancers (*Pink1*<sup>B9</sup>,

412 *Atg5<sup>5cc5</sup>*), for which only male animals were used. For ageing experiments, flies were  
413 maintained in bottles (MS experiments) or tubes (immunostaining experiments),  
414 transferred to fresh food thrice weekly, and harvested after 50 to 60 days.

415

#### 416 **Paraquat exposure assays**

417 For MS experiments, flies were maintained in bottles (100 to 200 flies per replicate)  
418 containing 9 semi-circular pieces of filter paper [90 mm diameter, Cat ID. 1001-090]  
419 saturated with 5 % (w/v) sucrose solution containing 5 mM paraquat. Sucrose-only  
420 starvation experiments were performed as above, with the omission of paraquat. After  
421 3 days, the flies were anaesthetised with mild CO<sub>2</sub> and live flies only were harvested.  
422 For pulse-chase experiments, 5-25 flies were harvested per replicate. The day 0  
423 control was taken prior to paraquat treatment, and the remaining flies were incubated  
424 overnight in bottles containing paraquat as above. The next day, flies were  
425 anaesthetised with CO<sub>2</sub>, dead flies were removed, a day 1 timepoint was taken, and  
426 the remaining flies were divided among tubes of food with no more than 20 flies per  
427 tube. At day 2, all flies were flipped onto fresh food, and then flipped every 2-3 days  
428 thereafter until harvest.

429

#### 430 **Mitochondrial enrichment by differential centrifugation**

431 All steps were performed on ice or at 4 °C. For mass spectrometry analysis,  
432 mitochondria were harvested from fresh (not frozen) flies according to (Lazarou et al.,  
433 2007), with modifications. Whole flies (60-200 per replicate) were placed in a dounce  
434 homogeniser, Solution A (70 mM sucrose, 20 mM HEPES pH 7.6, 220 mM mannitol,  
435 1 mM EDTA) containing cOmplete protease inhibitors (Roche) and PhosSTOP  
436 phosphatase inhibitors (Roche) was added (approximately 10 µL per fly), and the flies  
437 were homogenised with 35 strokes of a drill-fitted pestle. The homogenate was  
438 transferred to a 50 mL tube and incubated 30 minutes, then centrifuged for 5 minutes  
439 at 1,000 x g. The supernatant (containing mitochondria) was transferred to  
440 microcentrifuge tubes and centrifuged 15 minutes at 10,000 x g. The post-  
441 mitochondrial supernatant was removed and the pellet (containing mitochondria) was  
442 resuspended in Solution A. The homogenate was then clarified by centrifugation for 5  
443 minutes at 800 x g, and the supernatant transferred to a fresh tube. This clarification

444 step was repeated once more to ensure all cuticle was removed from the sample. The  
445 supernatant was then centrifuged 10 minutes at 10,000 x g, and the post-mitochondrial  
446 supernatant was discarded. The pellet was resuspended in Solution A and centrifuged  
447 10 minutes at 10,000 x g, and this wash step was repeated for a total of three times.  
448 The washed pellet was resuspended in Sucrose Storage Buffer (500 mM sucrose, 10  
449 mM HEPES pH 7.6) and stored at -80 °C until needed.

450

451 For immunoblotting analysis and biochemical fractionation from small numbers of flies  
452 (10-30), a modified mitochondrial enrichment procedure was performed. Flies were  
453 prepared either fresh or after flash-freezing in liquid nitrogen, with all direct  
454 comparisons performed with flies that were prepared in the same manner. Flies were  
455 transferred into a Dounce homogeniser containing 700 µL Solution A containing  
456 protease and phosphatase inhibitors as above, and manually homogenised with 50  
457 strokes of a pestle. The homogenate was transferred to an Eppendorf tube, a further  
458 500 µL of Solution A was added to the homogeniser and the sample was homogenised  
459 with a further 10 strokes. The homogenates were pooled and incubated for 30 minutes,  
460 then centrifuged for 5 minutes at 800 x g. The supernatant (containing mitochondria)  
461 was transferred to a new tube and clarified twice by centrifugation for 5 minutes at  
462 1,000 x g. The clarified supernatant was then centrifuged for 10 minutes at 10,000 x g  
463 and the post-mitochondrial supernatant was discarded or, in the case of biochemical  
464 fractionation experiments, further centrifuged for 30 minutes at 21,000 x g, and the  
465 pellet and supernatant retained for analysis. The mitochondrial pellet was washed  
466 once in Solution A containing only protease inhibitors, and then once in Solution A  
467 without inhibitors. The washed mitochondrial pellet was resuspended in 50 to 200 µL  
468 Sucrose Storage Buffer, the protein content determined by BCA assay (Thermo  
469 Pierce), and stored at -80 °C until needed.

470

#### 471 **USP2 treatment**

472 For the validation of pS65-Ub signal in *park*<sup>-/-</sup> samples, 30 µg protein per subcellular  
473 fraction was treated with the pan-specific deubiquitinase USP2 (BostonBiochem, E-  
474 506). The USP2 enzyme was diluted in buffer (50 mM Tris pH 7.5, 50 mM NaCl, 10  
475 mM DTT) (Hospenthal et al., 2015) and then added to the subcellular fractions to a

476 final USP2 concentration of 1  $\mu$ M. The mixture was incubated for 45 minutes at 37  $^{\circ}$ C  
477 prior to analysis by immunoblotting.

478

### 479 **Mass spectrometry sample preparation and analysis**

480 Absolute quantification (AQUA) analysis of Ub modifications was performed using Ub-  
481 Clipping (Swatek et al., 2019), with modifications. 500  $\mu$ g mitochondria (from  
482 approximately 100 flies) prepared as above were resuspended in 250  $\mu$ L TUBE lysis  
483 buffer (PBS containing 1% (v/v) NP-40, 2 mM EDTA, 10 mM chloroacetamide,  
484 cOmplete EDTA-free protease inhibitor cocktail (Roche)) supplemented with 8  $\mu$ g/ mL  
485 GST-Ubiquilin-UBA (Fiil et al., 2013; Hrdinka et al., 2016; Hjerpe et al., 2009). The  
486 lysate was incubated on ice for 20 minutes then centrifuged 15 minutes at 21,000 x g,  
487 4  $^{\circ}$ C. The clarified lysate was added to 20  $\mu$ L Glutathione Sepharose 4B resin (GE  
488 Healthcare) that had been washed three times in TUBE lysis buffer, and was incubated  
489 2 h at 4  $^{\circ}$ C with gentle rotation. The lysate was removed and the beads were washed  
490 twice with PBS containing 0.1% (v/v) Tween 20, then twice with PBS. 80  $\mu$ L Lb<sup>pro</sup>  
491 reaction buffer (50 mM NaCl, 50 mM Tris pH 7.4, 10 mM DTT) containing 20  $\mu$ M Ub-  
492 clippase (Lb<sup>pro</sup> construct containing residues 29-195 with L102W mutation, purified as  
493 described previously (Swatek et al., 2019; Guarné et al., 2000)) was added and Ub  
494 was cleaved from the beads for 16 h at 37  $^{\circ}$ C. The supernatant was removed, the  
495 beads were washed with Lb<sup>pro</sup> reaction buffer, and the supernatants pooled and  
496 acidified to pH <4 using formic acid (FA), prior to fractionation using StageTips  
497 (Rappsilber et al., 2007). StageTips were assembled using 4 plugs that were cut using  
498 a gauge 16 needle (Hamilton) from C<sub>4</sub> substrate (SPE-Disks-Bio-C4-300.47.20,  
499 AffiniSEP) and assembled into a P200 pipette tip using a plunger (Hamilton). The  
500 matrix was activated by the addition of 30  $\mu$ L methanol and the tip was centrifuged  
501 inside a 2 mL Eppendorf tube at 800 x g for 30 seconds at room temperature to allow  
502 the liquid to pass through. The tip was then equilibrated by passing through 30  $\mu$ L 80%  
503 (v/v) acetonitrile (ACN), 0.1% (v/v) FA, followed by 30  $\mu$ L 0.1% (v/v) FA. The acidified  
504 sample was loaded and centrifuged as above until almost all the liquid had passed  
505 through. The tip was then desalted by passing through 40  $\mu$ L 0.1% (v/v) FA, twice.  
506 The StageTip was then washed twice with 30  $\mu$ L 20% (v/v) ACN, 0.1% (v/v) FA, then  
507 the ubiquitin was eluted into a clean tube with two elutions of 30  $\mu$ L 45% (v/v) ACN,



508 0.1% (v/v) FA. The eluate was lyophilised and resuspended in Trypsin Resuspension  
509 Buffer (Promega) supplemented with Tris pH 8.0 to ensure a final pH above 6.  
510 Sequencing grade modified Trypsin (Promega) was added at a concentration of 1 µg  
511 per 250 µg initial mitochondrial protein, and the samples were incubated 16 h at 37  
512 °C. For StageTip purification after trypsin treatment, the sample was acidified to pH  
513 <4 using FA. AQUA peptides, supplied by Cambridge Research Biochemicals (pS65-  
514 Ub peptide) and Cell Signalling Technologies (all other peptides), were spiked in at  
515 concentrations as indicated in the Supplementary Table 1 and the sample was loaded  
516 into a StageTip containing 4 plugs of C<sub>18</sub> substrate (SPE-Disks-Bio-C18-100.47.20,  
517 AffiniSEP) that had been assembled, activated and pre-equilibrated as above. The tip  
518 was washed 3 times in 0.1% (v/v) FA, then elution was performed twice with 30 µL  
519 80% (v/v) ACN, 0.1% (v/v) FA. Samples were lyophilised and resuspended in 5% (v/v)  
520 ACN, 0.1% (v/v) FA, and 10µL was injected onto a Dionex Ultimate 3000 HPLC system  
521 (Thermo Fisher Scientific), and trapped on a C18Acclaim PepMap100 (5µm, 100µm  
522 x 20 mm nanoViper; Thermo Scientific). Peptides were eluted with a 60-minute  
523 acetonitrile gradient (2-40%) at a flow rate of 0.3 µL min<sup>-1</sup>. The analytical column outlet  
524 was directly interfaced via an EASY-Spray electrospray ionisation source to a Q  
525 Exactive mass spectrometer (Thermo Fisher Scientific). The following settings were  
526 used: resolution, 140,000; AGC target, 3E6; maximum injection time, 200 ms; scan  
527 range, 150-2,000 m/z. Absolute abundances of Ub peptides were calculated by peak  
528 integration using Xcalibur Qual Browser (Version 2.2, Thermo Fisher Scientific).  
529 Layouts were applied according to the Supplementary Table 1, and abundances were  
530 calculated relative to the known amount of added AQUA reference peptide using  
531 Microsoft Excel.

532

533 For the detection of pS65-Ub in young flies (Figure 1B), the following modifications to  
534 the method were performed. Instead of TUBE-mediated Ub pulldown, mitochondrial  
535 fractions were sodium carbonate-extracted to enrich ubiquitinated integral membrane  
536 proteins as previously described (Swatek et al., 2019). In brief, 4 mg mitochondria  
537 were resuspended in 4 mL 100 mM Na<sub>2</sub>CO<sub>3</sub>. The mixture was incubated 30 minutes  
538 on ice with occasional vortexing, then centrifuged 30 minutes, 21,000 x g, 4 °C. The  
539 supernatant, containing soluble and peripheral membrane proteins, was discarded

540 and the pellet, containing integral membrane proteins, was then resuspended in Lb<sup>pro</sup>  
541 reaction buffer (1  $\mu$ L per 10  $\mu$ g mitochondria). An equal volume of 20  $\mu$ M Lb<sup>pro</sup> was  
542 added (10  $\mu$ M final concentration) and the mixture was incubated overnight at 37 °C.  
543 The samples were centrifuged 30 minutes, 21,000 x g, 4 °C, and the supernatant was  
544 acidified and purified using StageTips as above (1 StageTip per 1 mg starting  
545 material). Trypsin treatment was performed as above and AQUA peptides were spiked  
546 in according to the Supplementary Table 1. Phospho-peptide enrichment was then  
547 performed using the High-Select<sup>TM</sup> TiO<sub>2</sub> Phospho-peptide Enrichment kit (Thermo  
548 Fisher Scientific). Each replicate was divided between two TiO<sub>2</sub> columns and prepared  
549 according to the manufacturer's instructions. The eluates were pooled, lyophilised and  
550 analysed by LC-MS as above.

551

### 552 **Antibodies and dyes**

553 The following mouse antibodies were used for immunoblotting (WB) and/or  
554 immunofluorescence (IF) in this study: ATP5A (ab14748, 1:10000 (WB), 1:300 (IF,  
555 adult muscle)), Ubiquitin (clone FK2, D058-3, 1:2000 (WB), 1:250 (IF, adult muscle),  
556 Actin (MAB1501, 1:1000 (WB)), GAPDH (GTX627408, 1:1000 (WB)). The following  
557 rabbit antibodies were used in this study: pS65-Ub (62802S, 1:750 (WB), 1:200 (IF,  
558 larval muscle), 1:120 (IF, adult muscle)), COXIV and SDHA (both kind gifts from  
559 Edward Owusu-Ansah (Murari et al., 2020), 1:2000 (WB)), Porin (PC548, 1:5000  
560 (WB)). The following secondary antibodies were used: sheep anti-mouse (HRP-  
561 conjugated, NXA931V, 1:10000 (WB)), donkey anti-rabbit (HRP-conjugated, NA934V,  
562 1:10000 (WB)), goat anti-mouse (AlexaFluor 488, A11001, 1:200 (IF)), goat anti-rabbit  
563 (AlexaFluor 594, A11012, 1:200 (IF)), goat anti-rabbit (AlexaFluor 647, A21244, 1:200  
564 (IF)).

565

### 566 **Whole-animal lysis and immunoblotting**

567 For the analysis of pS65-Ub levels in whole cell lysates by immunoblot, 180  $\mu$ L cold  
568 RIPA buffer (150 mM NaCl, 1% (v/v) NP-40, 0.5 % (w/v) sodium deoxycholate, 0.1%  
569 (w/v) SDS, 50 mM Tris pH 7.4), supplemented with cOmplete and PhosSTOP  
570 inhibitors, was added to 2 mL tubes containing 1.4 mm ceramic beads (Fisherbrand  
571 15555799). Animals (5 to 20 per replicate) were harvested and stored on ice or flash-

572 frozen in liquid N<sub>2</sub>, with all direct comparisons performed with flies that were harvested  
573 in the same manner. The flies were added to the tubes containing RIPA buffer and  
574 lysed using a Minilys homogeniser (Bertin Instruments) with the following settings:  
575 maximum speed, 10 seconds on, 10 seconds on ice, for a total of three cycles. After  
576 lysis, samples were returned to ice for 10 minutes then centrifuged 5 minutes at 21,000  
577 x g, 4 °C. 90 µL supernatant was transferred to a fresh Eppendorf tube and centrifuged  
578 a further 10 minutes at 21,000 x g. 50 µL supernatant was then transferred to a fresh  
579 Eppendorf tube and the protein content determined by BCA assay as above. 30 µg  
580 total protein was then diluted in NuPAGE LDS loading dye (Invitrogen) and analysed  
581 by SDS-PAGE using Novex 4-12% Bis-Tris NuPAGE gels (Invitrogen). For the  
582 analysis of mitochondria-enriched fractions, 30 to 50 µg mitochondrial protein was  
583 aliquoted into a tube, centrifuged 10 minutes at 16,000 x g, the supernatant removed  
584 and the pellet resuspended in LDS loading dye prior to SDS-PAGE analysis as above.  
585 Gels were transferred onto pre-cut and -soaked PVDF membranes (1704157, BioRad)  
586 using the BioRad Transblot Turbo transfer system, and blots were immediately stained  
587 with Revert total protein stain (LiCOR) where indicated, according to the  
588 manufacturer's instructions. Fluorescence intensity was measured using a BioRad  
589 Chemidoc MP using the IR680 setting. Blots were then washed by gentle shaking 3  
590 times for 5 minutes in PBS containing 0.1% (v/v) Tween-20 (PBST), and blocked by  
591 incubation with PBST containing 5% (w/v) skim milk for 30 minutes. Blots were washed  
592 a further 3 times as above then incubated at 4 °C overnight with primary antibodies in  
593 PBST containing 3 % (w/v) BSA. A further 3 washes were performed then the blots  
594 were incubated for one hour in secondary antibodies made up in PBST containing 5%  
595 (w/v) skim milk. Blots were then washed twice in PBST and once in PBS (twice in the  
596 case of pS65-Ub blots) prior to incubation with ECL reagent. For pS65-Ub blots,  
597 SuperSignal Femto reagent (Thermo Scientific) was used, while other blots used  
598 Clarity ECL reagent (BioRad). Blots were imaged using the BioRad Chemidoc MP  
599 using exposure settings to minimise overexposure, except where high exposure is  
600 indicated. Image analysis was performed using Image Lab (Version 5.2.1 build 11,  
601 BioRad) and images were exported as TIFF files for presentation.

602

603 **Immunostaining of *Drosophila* tissues**

604 Larval filet and adult thoraces dissections were performed in PBS and fixed in 4%  
605 formaldehyde, pH 7.0, for 20 (larval filet) or 30 (adult flight muscles) minutes  
606 respectively. Permeabilisation was performed for 30 minutes in PBS containing 0.3%  
607 (v/v) Triton X-100 (PBS-TX), then tissues were blocked for 1 h in PBS-TX containing  
608 1% (w/v) BSA. Primary antibody incubation was performed overnight at 4 °C in PBS-  
609 TX containing 1% (w/v) BSA. The tissues were washed 3 times for 10 minutes each  
610 in PBS-TX prior to incubation with secondary antibodies in PBS-TX containing 1%  
611 (w/v) BSA for 2 h at room temperature (larval filet) or overnight at 4 °C (adult thoraces).  
612 The tissues were washed three times for 10 minutes in PBS-TX, then once for 10  
613 minutes in PBS, and rinsed once in water prior to mounting in Prolong Diamond  
614 Antifade mounting media with DAPI (Thermo Fisher Scientific).

615

### 616 **Microscopy and image analysis**

617 Fluorescence microscopy imaging was performed using a Zeiss LSM 880 confocal  
618 microscope equipped with a 20x Plan Apochromat (air, NA = 0.8) and 63x Plan  
619 Apochromat (oil immersion, NA = 1.4) objective lenses. Laser power and gain settings  
620 were adjusted depending on the fluorophore, but were maintained across samples for  
621 the purpose of comparing pS65-Ub levels among genotypes. For imaging OMM-GFP,  
622 the GFP component of mito-QC constructs (UAS-mCherry-GFP-Fis1<sup>101-152</sup>) was  
623 imaged in conjunction with AlexaFluor 647 for pS65-Ub.

624

625 Images were processed using FIJI (ImageJ, Version 2.1.0/1.53c) for figure  
626 presentation. For the quantification of pS65-Ub puncta in larval muscle 6-7 (Figure  
627 5H), z-stacks (5 per image, 0.28 µm step size) were cropped to remove extraneous  
628 tissue, axons, and neuromuscular junctions, which we observed contained high  
629 background signal with the anti-pS65-Ub antibody. The retained area was measured,  
630 local background subtraction was performed, and the number of puncta quantified  
631 using the 3D Object Counter v2.0 program on FIJI using the same threshold value for  
632 all samples. Puncta with a size smaller than 0.1 µm<sup>3</sup> were excluded, and the remaining  
633 puncta considered to be true pS65-Ub puncta. The data were imported into Prism and  
634 a frequency distribution analysis performed to obtain number and mean volume of  
635 puncta.

636

## 637 **Statistical Analysis**

638 Statistical analyses were performed using Prism (Version 9.1.0 (216)). For the analysis  
639 of mass spectrometry data presented in Figure 2, each Ub modification was analysed  
640 by Ordinary one-way ANOVA with Šidák's correction for multiple comparisons (wild-  
641 type untreated compared with *Pink1*<sup>-</sup> and *park*<sup>-/-</sup> untreated, and +/- paraquat  
642 comparison within each genotype, five comparisons total). The pS65-Ub abundance  
643 presented in Figure 6C was analysed by Ordinary one-way ANOVA with Dunnett's  
644 correction for multiple comparisons (each genotype compared with *Atg5*<sup>-</sup>, two  
645 comparisons total). For the analysis of number of pS65-Ub puncta in Figure 5H, data  
646 were first log-transformed ( $Y = \ln(y+1)$ ) to account for heteroscedasticity in the raw  
647 data. The transformed data, as well as the raw data in Figure 5I, were analysed by  
648 One-way ANOVA with Dunnett's multiple comparisons (each genotype compared with  
649 *park*<sup>-/-</sup>).

650

## 651 **Data Availability**

652 All data generated or analysed during this study are included in the manuscript and  
653 supporting files.

654

## 655 **Author Contributions**

656 JLU Conceptualization, Data curation, Formal analysis, Validation, Methodology,  
657 Writing - original draft.

658 JLL Formal analysis, Methodology, Writing - review and editing.

659 ASM Formal analysis, Methodology, Writing - review and editing.

660 AJW Conceptualization, Formal analysis, Supervision, Funding acquisition,  
661 Investigation, Project administration, Writing – original draft, review and editing.

662

## 663 **Competing Interests**

664 No competing interests declared.

665

## 666 **Acknowledgements**

667 This work is supported by Medical Research Council core funding (MC\_UU\_00015/6).  
668 JLU was supported by a Gates Cambridge Scholarship. We thank Prof. D. Komander  
669 for reagents and for support in the early phase of this project. The funders had no role  
670 in study design, data collection and analysis, decision to publish, or preparation of the  
671 manuscript. Stocks were obtained from the Vienna *Drosophila* Stock Centre and the  
672 Bloomington *Drosophila* Stock Center which is supported by grant NIH P40OD018537.  
673 We thank Prof. G Juhasz for generously sharing fly stocks, and we thank Whitworth  
674 lab members for discussions and critical reading of the manuscript.  
675

789 **References**

790  
791

792 Andrezza, S., C.L. Samstag, A. Sanchez-Martinez, E. Fernandez-Vizarra, A.  
793 Gomez-Duran, J.J. Lee, R. Tufi, M.J. Hipp, E.K. Schmidt, T.J. Nicholls, P.A.  
794 Gammage, P.F. Chinnery, M. Minczuk, L.J. Pallanck, S.R. Kennedy, and A.J.  
795 Whitworth. 2019. Mitochondrially-targeted APOBEC1 is a potent mtDNA mutator  
796 affecting mitochondrial function and organismal fitness in *Drosophila*. *Nat*  
797 *Commun.* 10:3280. doi:10.1038/s41467-019-10857-y.

798 Boyle, K.B., B.J. Ravenhill, and F. Randow. 2019. CALCOCO2/NDP52 initiates  
799 selective autophagy through recruitment of ULK and TBK1 kinase complexes.  
800 *Autophagy*. 15:1655–1656. doi:10.1080/15548627.2019.1628548.

801 Burman, J.L., S. Pickles, C. Wang, S. Sekine, J.S. Vargas, Z. Zhang, A.M. Youle,  
802 C.L. Nezich, X. Wu, J.A. Hammer, and R.J. Youle. 2017. Mitochondrial fission  
803 facilitates the selective mitophagy of protein aggregates. *J Cell Biol.* 216:3231–  
804 3247. doi:10.1083/jcb.201612106.

805 Clark, I.E., M.W. Dodson, C. Jiang, J.H. Cao, J.R. Huh, J. Seol, S. Yoo, B.A. Hay,  
806 and M. Guo. 2006. *Drosophila* pink1 is required for mitochondrial function and  
807 interacts genetically with parkin. *Nature*. 441:1162. doi:10.1038/nature04779.

808 GBD 2016 Parkinson's Disease Collaborators, E.R. Dorsey, A. Elbaz, E. Nichols, F.  
809 Abd-Allah, A. Abdelalim, J.C. Adsuar, M.G. Ansha, C. Brayne, J.-Y.J. Choi, D.  
810 Collado-Mateo, N. Dahodwala, H.P. Do, D. Edessa, M. Endres, S.-M.  
811 Fereshtehnejad, K.J. Foreman, F.G. Gankpe, R. Gupta, G.J. Hankey, S.I. Hay,  
812 M.I. Hegazy, D.T. Hibstu, A. Kasaeian, Y. Khader, I. Khalil, Y.-H. Khang, Y.J. Kim,  
813 Y. Kokubo, G. Logroscino, J. Massano, N.M. Ibrahim, M.A. Mohammed, A.  
814 Mohammadi, M. Moradi-Lakeh, M. Naghavi, B.T. Nguyen, Y.L. Nirayo, F.A. Ogbo,  
815 M.O. Owolabi, D.M. Pereira, M.J. Postma, M. Qorbani, M.A. Rahman, K.T. Roba,  
816 H. Safari, S. Safiri, M. Satpathy, M. Sawhney, A. Shafieesabet, M.S. Shiferaw, M.  
817 Smith, C.E.I. Szoeki, R. Tabarés-Seisdedos, N.T. Truong, K.N. Ukwaja, N.  
818 Venketasubramanian, S. Villafaina, K. Gidey Weldegewergs, R. Westerman, T.  
819 Wijeratne, A.S. Winkler, B.T. Xuan, N. Yonemoto, V.L. Feigin, T. Vos, and C.J.L.  
820 Murray. 2018. Global, regional, and national burden of Parkinson's disease,  
821 1990–2016: a systematic analysis for the Global Burden of Disease Study 2016.  
822 *Lancet Neurology*. 17:939–953. doi:10.1016/s1474-4422(18)30295-3.

823 Cornelissen, T., S. Vilain, K. Vints, N. Gounko, P. Verstreken, and W.  
824 Vandenberghe. 2018. Deficiency of parkin and PINK1 impairs age-dependent  
825 mitophagy in *Drosophila*. *Elife*. 7. doi:10.7554/eLife.35878.

826 Cunningham, C.N., J.M. Baughman, L. Phu, J.S. Tea, C. Yu, M. Coons, D.S.  
827 Kirkpatrick, B. Bingol, and J.E. Corn. 2015. USP30 and parkin homeostatically  
828 regulate atypical ubiquitin chains on mitochondria. *Nature cell biology*. 17:160–9.  
829 doi:10.1038/ncb3097.

- 830 Fiil, B., R. Damgaard, S. Wagner, K. Keusekotten, M. Fritsch, S. Bekker-Jensen, N.  
831 Mailand, C. Choudhary, D. Komander, and M. Gyrd-Hansen. 2013. OTULIN  
832 restricts Met1-linked ubiquitination to control innate immune signaling. *Mol Cell*.  
833 50:818–30. doi:10.1016/j.molcel.2013.06.004.
- 834 Gersch, M., C. Gladkova, A.F. Schubert, M.A. Michel, S. Maslen, and D. Komander.  
835 2017. Mechanism and regulation of the Lys6-selective deubiquitinase USP30.  
836 *Nature Structural and Molecular Biology*. nsmb.3475. doi:10.1038/nsmb.3475.
- 837 Gladkova, C., S.L. Maslen, M.J. Skehel, and D. Komander. 2018. Mechanism of  
838 parkin activation by PINK1. *Nature*. 559:410–414. doi:10.1038/s41586-018-0224-  
839 x.
- 840 Greene, J.C., A.J. Whitworth, I. Kuo, L.A. Andrews, M.B. Feany, and L.J. Pallanck.  
841 2003. Mitochondrial pathology and apoptotic muscle degeneration in *Drosophila*  
842 parkin mutants. *Proc National Acad Sci*. 100:4078–4083.  
843 doi:10.1073/pnas.0737556100.
- 844 Guarné, A., B. Hampoelz, W. Glaser, and X. Carpena. 2000. Structural and  
845 biochemical features distinguish the foot-and-mouth disease virus leader  
846 proteinase from other papain-like enzymes.
- 847 Heo, J.-M., A. Ordureau, J.A. Paulo, J. Rinehart, and W.J. Harper. 2015. The PINK1-  
848 PARKIN Mitochondrial Ubiquitylation Pathway Drives a Program of OPTN/NDP52  
849 Recruitment and TBK1 Activation to Promote Mitophagy. *Molecular Cell*. 60:7–20.  
850 doi:10.1016/j.molcel.2015.08.016.
- 851 Hjerpe, R., F. Aillet, F. Lopitz-Otsoa, V. Lang, P. England, and M.S. Rodriguez.  
852 2009. Efficient protection and isolation of ubiquitylated proteins using tandem  
853 ubiquitin-binding entities. *Embo Rep*. 10:1250–1258.  
854 doi:10.1038/embor.2009.192.
- 855 Hospenhal, M.K., T.E. Mevissen, and D. Komander. 2015. Deubiquitinase-based  
856 analysis of ubiquitin chain architecture using Ubiquitin Chain Restriction  
857 (UbiCRest). *Nature protocols*. 10:349–61. doi:10.1038/nprot.2015.018.
- 858 Hrdinka, M., B.K. Fiil, M. Zucca, D. Leske, K. Bagola, M. Yabal, P.R. Elliott, R.B.  
859 Damgaard, D. Komander, P.J. Jost, and M. Gyrd-Hansen. 2016. CYLD Limits  
860 Lys63- and Met1-Linked Ubiquitin at Receptor Complexes to Regulate Innate  
861 Immune Signaling. *Cell Reports*. 14:2846–2858.  
862 doi:10.1016/j.celrep.2016.02.062.
- 863 Jacoupy, M., E. Hamon-Keromen, A. Ordureau, Z. Erpapazoglou, F. Coge, J.-C.  
864 Corvol, O. Nosjean, M.C. la Cour, M. Millan, J. Boutin, J. Harper, A. Brice, D.  
865 Guedin, C. Gautier, and O. Corti. 2019. The PINK1 kinase-driven ubiquitin ligase  
866 Parkin promotes mitochondrial protein import through the presequence pathway in  
867 living cells. *Scientific Reports*. 9:1–15. doi:10.1038/s41598-019-47352-9.



- 868 Kane, L.A., M. Lazarou, A.I. Fogel, Y. Li, K. Yamano, S.A. Sarraf, S. Banerjee, and  
869 R.J. Youle. 2014. PINK1 phosphorylates ubiquitin to activate Parkin E3 ubiquitin  
870 ligase activity. *The Journal of cell biology*. 205:143–53.  
871 doi:10.1083/jcb.201402104.
- 872 Kazlauskaitė, A., C. Kondapalli, R. Gourlay, D.G. Campbell, M.S. Ritorto, K.  
873 Hofmann, D.R. Alessi, A. Knebel, M. Trost, and M.M. Muqit. 2014. Parkin is  
874 activated by PINK1-dependent phosphorylation of ubiquitin at Ser65. *The*  
875 *Biochemical journal*. 460:127–39. doi:10.1042/BJ20140334.
- 876 Kim, M., E. Sandford, D. Gatica, Y. Qiu, X. Liu, Y. Zheng, B.A. Schulman, J. Xu, I.  
877 Semple, S.-H. Ro, B. Kim, N.R. Mavioglu, A. Tolun, A. Jipa, S. Takats, M. Karpati,  
878 J.Z. Li, Z. Yapici, G. Juhasz, J. Lee, D.J. Klionsky, and M. Burmeister. 2016.  
879 Mutation in ATG5 reduces autophagy and leads to ataxia with developmental  
880 delay. *Elife*. 5:e12245. doi:10.7554/elife.12245.
- 881 Kim, Y.Y., J. Um, J. Yoon, H. Kim, D. Lee, Y.J. Lee, H.J. Jee, Y.M. Kim, J.S. Jang,  
882 Y. Jang, J. Chung, H.T. Park, T. Finkel, H. Koh, and J. Yun. 2019. Assessment of  
883 mitophagy in mt-Keima *Drosophila* revealed an essential role of the PINK1-Parkin  
884 pathway in mitophagy induction in vivo. *Faseb J*. 33:9742–9751.  
885 doi:10.1096/fj.201900073r.
- 886 Kitada, T., S. Asakawa, N. Hattori, H. Matsumine, Y. Yamamura, S. Minoshima, M.  
887 Yokochi, Y. Mizuno, and N. Shimizu. 1998. Mutations in the parkin gene cause  
888 autosomal recessive juvenile parkinsonism. *Nature*. 392:605–8.  
889 doi:10.1038/33416.
- 890 Kondapalli, C., A. Kazlauskaitė, N. Zhang, H.I. Woodroof, D.G. Campbell, R.  
891 Gourlay, L. Burchell, H. Walden, T.J. Macartney, M. Deak, A. Knebel, D.R. Alessi,  
892 and M.M. Muqit. 2012. PINK1 is activated by mitochondrial membrane potential  
893 depolarization and stimulates Parkin E3 ligase activity by phosphorylating Serine  
894 65. *Open Biology*. 2:120080. doi:10.1098/rsob.120080.
- 895 Koyano, F., K. Okatsu, H. Kosako, Y. Tamura, E. Go, M. Kimura, Y. Kimura, H.  
896 Tsuchiya, H. Yoshihara, T. Hirokawa, T. Endo, E.A. Fon, J.-F. Trempe, Y. Saeki,  
897 K. Tanaka, and N. Matsuda. 2014. Ubiquitin is phosphorylated by PINK1 to  
898 activate parkin. *Nature*. 510:162–166. doi:10.1038/nature13392.
- 899 Koyano, F., K. Yamano, H. Kosako, K. Tanaka, and N. Matsuda. 2019. Parkin  
900 recruitment to impaired mitochondria for nonselective ubiquitylation is facilitated  
901 by MITOL. *J Biol Chem*. 294:10300–10314. doi:10.1074/jbc.ra118.006302.
- 902 Lazarou, M., M. McKenzie, A. Ohtake, D.R. Thorburn, and M.T. Ryan. 2007.  
903 Analysis of the Assembly Profiles for Mitochondrial- and Nuclear-DNA-Encoded  
904 Subunits into Complex I. *Mol Cell Biol*. 27:4228–4237. doi:10.1128/mcb.00074-07.

- 905 Lazarou, M., D.A. Sliter, L.A. Kane, S.A. Sarraf, C. Wang, J.L. Burman, D.P. Sideris,  
906 A.I. Fogel, and R.J. Youle. 2015. The ubiquitin kinase PINK1 recruits autophagy  
907 receptors to induce mitophagy. *Nature*. 524:309–314. doi:10.1038/nature14893.
- 908 Lee, J.J., A. Sanchez-Martinez, A.M. Zarate, C. Benincá, U. Mayor, M.J. Clague, and  
909 A.J. Whitworth. 2018. Basal mitophagy is widespread in *Drosophila* but minimally  
910 affected by loss of Pink1 or parkin. *J Cell Biol*. 217:1613–1622.  
911 doi:10.1083/jcb.201801044.
- 912 Liu, S., and B. Lu. 2010. Reduction of Protein Translation and Activation of  
913 Autophagy Protect against PINK1 Pathogenesis in *Drosophila melanogaster*. *Plos*  
914 *Genet*. 6:e1001237. doi:10.1371/journal.pgen.1001237.
- 915 Liu, Y.-T., D.A. Sliter, M.K. Shammass, X. Huang, C. Wang, H. Calvelli, D.S. Maric,  
916 and D.P. Narendra. 2021. Mt-Keima detects PINK1-PRKN mitophagy in vivo with  
917 greater sensitivity than mito-QC. *Autophagy*. 1–10.  
918 doi:10.1080/15548627.2021.1896924.
- 919 Martinez, A., B. Lectez, J. Ramirez, O. Popp, J.D. Sutherland, S. Urbé, G. Dittmar,  
920 M.J. Clague, and U. Mayor. 2017. Quantitative proteomic analysis of Parkin  
921 substrates in *Drosophila* neurons. *Molecular neurodegeneration*. 12:29.  
922 doi:10.1186/s13024-017-0170-3.
- 923 McLelland, G., V. Soubannier, C.X. Chen, H.M. McBride, and E.A. Fon. 2014. Parkin  
924 and PINK1 function in a vesicular trafficking pathway regulating mitochondrial  
925 quality control. *The EMBO Journal*. 33:282–295. doi:10.1002/embj.201385902.
- 926 McLelland, G.-L.L., T. Goiran, W. Yi, G. Dorval, C.X. Chen, N.D. Lauinger, A.I.  
927 Krahn, S. Valimehr, A. Rakovic, I. Rouiller, T.M. Durcan, J.-F.F. Trempe, and E.A.  
928 Fon. 2018. Mfn2 ubiquitination by PINK1/parkin gates the p97-dependent release  
929 of ER from mitochondria to drive mitophagy. *Elife*. 7. doi:10.7554/eLife.32866.
- 930 McWilliams, T.G., A.R. Prescott, L. Montava-Garriga, G. Ball, F. Singh, E. Barini,  
931 M.M.K. Muqit, S.P. Brooks, and I.G. Ganley. 2018. Basal Mitophagy Occurs  
932 Independently of PINK1 in Mouse Tissues of High Metabolic Demand. *Cell Metab*.  
933 27:439-449.e5. doi:10.1016/j.cmet.2017.12.008.
- 934 Murari, A., S.-K. Rhooms, N.S. Goparaju, M. Villanueva, and E. Owusu-Ansah.  
935 2020. An antibody toolbox to track complex I assembly defines AIF's  
936 mitochondrial function. *J Cell Biol*. 219:e202001071. doi:10.1083/jcb.202001071.
- 937 Narendra, D., A. Tanaka, D.-F. Suen, and R.J. Youle. 2008. Parkin is recruited  
938 selectively to impaired mitochondria and promotes their autophagy. *The Journal of*  
939 *Cell Biology*. 183:795–803. doi:10.1083/jcb.200809125.
- 940 Nguyen, T.N., B.S. Padman, J. Usher, V. Oorschot, G. Ramm, and M. Lazarou.  
941 2016. Atg8 family LC3/GABARAP proteins are crucial for autophagosome–  
942 lysosome fusion but not autophagosome formation during PINK1/Parkin

- 943 mitophagy and starvation Role of Atg8s in autophagosome–lysosome fusion. *J*  
944 *Cell Biology*. 215:857–874. doi:10.1083/jcb.201607039.
- 945 Okatsu, K., M. Kimura, T. Oka, K. Tanaka, and N. Matsuda. 2015a. Unconventional  
946 PINK1 localization to the outer membrane of depolarized mitochondria drives  
947 Parkin recruitment. *J Cell Sci*. 128:964–78. doi:10.1242/jcs.161000.
- 948 Okatsu, K., F. Koyano, M. Kimura, H. Kosako, Y. Saeki, K. Tanaka, and N. Matsuda.  
949 2015b. Phosphorylated ubiquitin chain is the genuine Parkin receptor. *The Journal*  
950 *of Cell Biology*. 209:111–128. doi:10.1083/jcb.201410050.
- 951 Ordureau, A., J.-M.M. Heo, D.M. Duda, J.A. Paulo, J.L. Olszewski, D. Yanishevski,  
952 J. Rinehart, B.A. Schulman, and J.W. Harper. 2015. Defining roles of PARKIN and  
953 ubiquitin phosphorylation by PINK1 in mitochondrial quality control using a  
954 ubiquitin replacement strategy. *Proceedings of the National Academy of Sciences*  
955 *of the United States of America*. 112:6637–42. doi:10.1073/pnas.1506593112.
- 956 Ordureau, A., J.A. Paulo, J. Zhang, H. An, K.N. Swatek, J.R. Cannon, Q. Wan, D.  
957 Komander, W.J. Harper, A. Ordureau, J.A. Paulo, J. Zhang, H. An, K.N. Swatek,  
958 J.R. Cannon, Q. Wan, D. Komander, and W.J. Harper. 2020. Global Landscape  
959 and Dynamics of Parkin and USP30-Dependent Ubiquitylomes in iNeurons during  
960 Mitophagic Signaling. *Molecular Cell*. doi:10.1016/j.molcel.2019.11.013.
- 961 Ordureau, A., J.A. Paulo, W. Zhang, T. Ahfeldt, J. Zhang, E.F. Cohn, Z. Hou, J.-M.  
962 Heo, L.L. Rubin, S.S. Sidhu, S.P. Gygi, and W.J. Harper. 2018. Dynamics of  
963 PARKIN-Dependent Mitochondrial Ubiquitylation in Induced Neurons and Model  
964 Systems Revealed by Digital Snapshot Proteomics. *Molecular Cell*.  
965 doi:10.1016/j.molcel.2018.03.012.
- 966 Ordureau, A., S.A. Sarraf, D.M. Duda, J.-M. Heo, M.P. Jedrychowski, V.O.  
967 Sviderskiy, J.L. Olszewski, J.T. Koerber, T. Xie, S.A. Beausoleil, J.A. Wells, S.P.  
968 Gygi, B.A. Schulman, and W.J. Harper. 2014. Quantitative Proteomics Reveal a  
969 Feedforward Mechanism for Mitochondrial PARKIN Translocation and Ubiquitin  
970 Chain Synthesis. *Molecular Cell*. 56:360–375. doi:10.1016/j.molcel.2014.09.007.
- 971 Park, J., S. Lee, S. Lee, Y. Kim, S. Song, S. Kim, E. Bae, J. Kim, M. Shong, J.-M.  
972 Kim, and J. Chung. 2006. Mitochondrial dysfunction in *Drosophila* PINK1 mutants  
973 is complemented by parkin. *Nature*. 441:1157–1161. doi:10.1038/nature04788.
- 974 Poole, A.C., R.E. Thomas, L.A. Andrews, H.M. McBride, A.J. Whitworth, and L.J.  
975 Pallanck. 2008. The PINK1/Parkin pathway regulates mitochondrial morphology.  
976 *Proceedings of the National Academy of Sciences*. 105:1638–1643.  
977 doi:10.1073/pnas.0709336105.
- 978 Rappsilber, J., M. Mann, and Y. Ishihama. 2007. Protocol for micro-purification,  
979 enrichment, pre-fractionation and storage of peptides for proteomics using  
980 StageTips. *Nat Protoc*. 2:1896–1906. doi:10.1038/nprot.2007.261.

- 981 Ryan, T.A., E.O. Phillips, C.L. Collier, A. Robinson, D. Routledge, R.E. Wood, E.A.  
982 Assar, and D.A. Tumbarello. 2020. Tollip coordinates Parkin-dependent trafficking  
983 of mitochondrial-derived vesicles. *Embo J.* e102539.  
984 doi:10.15252/embj.2019102539.
- 985 Sato, Y., K. Okatsu, Y. Saeki, K. Yamano, N. Matsuda, A. Kaiho, A. Yamagata, S.  
986 Goto-Ito, M. Ishikawa, Y. Hashimoto, K. Tanaka, and S. Fukai. 2017. Structural  
987 basis for specific cleavage of Lys6-linked polyubiquitin chains by USP30. *Nat*  
988 *Struct Mol Biol.* 24:911–919. doi:10.1038/nsmb.3469.
- 989 Sauvé, V., G. Sung, N. Soya, G. Kozlov, N. Blaimschein, L. Miotto, J.-F. Trempe,  
990 G.L. Lukacs, and K. Gehring. 2018. Mechanism of parkin activation by  
991 phosphorylation. *Nature Structural & Molecular Biology.* 25:623–630.  
992 doi:10.1038/s41594-018-0088-7.
- 993 Shiba-Fukushima, K., Y. Imai, S. Yoshida, Y. Ishihama, T. Kanao, S. Sato, and N.  
994 Hattori. 2012. PINK1-mediated phosphorylation of the Parkin ubiquitin-like domain  
995 primes mitochondrial translocation of Parkin and regulates mitophagy. *Scientific*  
996 *Reports.* 2:1002. doi:10.1038/srep01002.
- 997 Stern, M.B., A. Lang, and W. Poewe. 2012. Toward a redefinition of Parkinson's  
998 disease. *Movement Disord.* 27:54–60. doi:10.1002/mds.24051.
- 999 Stevens, D.A., Y. Lee, H. Kang, B. Lee, Y.-I. Lee, A. Bower, H. Jiang, S.-U. Kang,  
1000 S.A. Andrabi, V.L. Dawson, J.-H. Shin, and T.M. Dawson. 2015. Parkin loss leads  
1001 to PARIS-dependent declines in mitochondrial mass and respiration. *P Natl Acad*  
1002 *Sci Usa.* 112:11696–701. doi:10.1073/pnas.1500624112.
- 1003 Sugiura, A., G. McLelland, E.A. Fon, and H.M. McBride. 2014. A new pathway for  
1004 mitochondrial quality control: mitochondrial-derived vesicles. *Embo J.* 33:2142–  
1005 2156. doi:10.15252/embj.201488104.
- 1006 Swatek, K.N., and D. Komander. 2016. Ubiquitin modifications. *Cell research.*  
1007 26:399–422. doi:10.1038/cr.2016.39.
- 1008 Swatek, K.N., J.L. Usher, A.F. Kueck, C. Gladkova, T.E. Mevissen, J.N. Pruneda, T.  
1009 Skern, and D. Komander. 2019. Insights into ubiquitin chain architecture using  
1010 Ub-clipping. *Nature.* 572:533–537. doi:10.1038/s41586-019-1482-y.
- 1011 Tanaka, A., M.M. Cleland, S. Xu, D.P. Narendra, D.-F. Suen, M. Karbowski, and R.J.  
1012 Youle. 2010. Proteasome and p97 mediate mitophagy and degradation of  
1013 mitofusins induced by Parkin. *The Journal of Cell Biology.* 191:1367–1380.  
1014 doi:10.1083/jcb.201007013.
- 1015 Tanner, C.M., F. Kamel, W.G. Ross, J.A. Hoppin, S.M. Goldman, M. Korell, C.  
1016 Marras, G.S. Bhudhikanok, M. Kasten, A.R. Chade, K. Comyns, M. Richards, C.  
1017 Meng, B. Priestley, H.H. Fernandez, F. Cambi, D.M. Umbach, A. Blair, D.P.

- 1018 Sandler, and W.J. Langston. 2011. Rotenone, paraquat, and Parkinson's disease.  
1019 *Environ Health Persp.* 119:866–72. doi:10.1289/ehp.1002839.
- 1020 Valente, E.M., P.M. Abou-Sleiman, V. Caputo, M.M.K. Muqit, K. Harvey, S. Gispert,  
1021 Z. Ali, D.D. Turco, A.R. Bentivoglio, D.G. Healy, A. Albanese, R. Nussbaum, R.  
1022 González-Maldonado, T. Deller, S. Salvi, P. Cortelli, W.P. Gilks, D.S. Latchman,  
1023 R.J. Harvey, B. Dallapiccola, G. Auburger, and N.W. Wood. 2004. Hereditary  
1024 Early-Onset Parkinson's Disease Caused by Mutations in *PINK1*. *Science*.  
1025 304:1158–1160. doi:10.1126/science.1096284.
- 1026 Vincow, E.S., G. Merrihew, R.E. Thomas, N.J. Shulman, R.P. Beyer, M.J. MacCoss,  
1027 and L.J. Pallanck. 2013. The PINK1-Parkin pathway promotes both mitophagy  
1028 and selective respiratory chain turnover in vivo. *P Natl Acad Sci Usa*. 110:6400–5.  
1029 doi:10.1073/pnas.1221132110.
- 1030 Vives-Bauza, C., C. Zhou, Y. Huang, M. Cui, R.L.A. de Vries, J. Kim, J. May, M.A.  
1031 Tocilescu, W. Liu, H.S. Ko, J. Magrané, D.J. Moore, V.L. Dawson, R. Grailhe,  
1032 T.M. Dawson, C. Li, K. Tieu, and S. Przedborski. 2010. PINK1-dependent  
1033 recruitment of Parkin to mitochondria in mitophagy. *Proc National Acad Sci*.  
1034 107:378–383. doi:10.1073/pnas.0911187107.
- 1035 Watzlawik, J.O., X. Hou, D. Truban, C. Ramnarine, S.K. Barodia, T.F. Gendron,  
1036 M.G. Heckman, M. DeTure, J. Siuda, Z.K. Wszolek, C.R. Scherzer, O.A. Ross, G.  
1037 Bu, D.W. Dickson, M.S. Goldberg, F.C. Fiesel, and W. Springer. 2020. Sensitive  
1038 ELISA-based detection method for the mitophagy marker p-S65-Ub in human  
1039 cells, autopsy brain, and blood samples. *Autophagy*. 1–16.  
1040 doi:10.1080/15548627.2020.1834712.
- 1041 Wauer, T., K.N. Swatek, J.L. Wagstaff, C. Gladkova, J.N. Pruneda, M.A. Michel, M.  
1042 Gersch, C.M. Johnson, S.M. Freund, and D. Komander. 2015. Ubiquitin Ser65  
1043 phosphorylation affects ubiquitin structure, chain assembly and hydrolysis. *The*  
1044 *EMBO journal*. 34:307–325. doi:10.15252/embj.201489847.
- 1045 Whitworth, A.J., D.A. Theodore, J.C. Greene, H. Beneš, P.D. Wes, and L.J.  
1046 Pallanck. 2005. Increased glutathione S-transferase activity rescues dopaminergic  
1047 neuron loss in a *Drosophila* model of Parkinson's disease. *Proc National Acad*  
1048 *Sci*. 102:8024–8029. doi:10.1073/pnas.0501078102.
- 1049 Yamano, K., R. Kikuchi, W. Kojima, R. Hayashida, F. Koyano, J. Kawawaki, T.  
1050 Shoda, Y. Demizu, M. Naito, K. Tanaka, and N. Matsuda. 2020. Critical role of  
1051 mitochondrial ubiquitination and the OPTN-ATG9A axis in mitophagy. *J Cell*  
1052 *Biology*. 219. doi:10.1083/jcb.201912144.
- 1053 Yamano, K., and R.J. Youle. 2013. PINK1 is degraded through the N-end rule  
1054 pathway. *Autophagy*. 9:1758–1769. doi:10.4161/auto.24633.
- 1055

## Figure 1

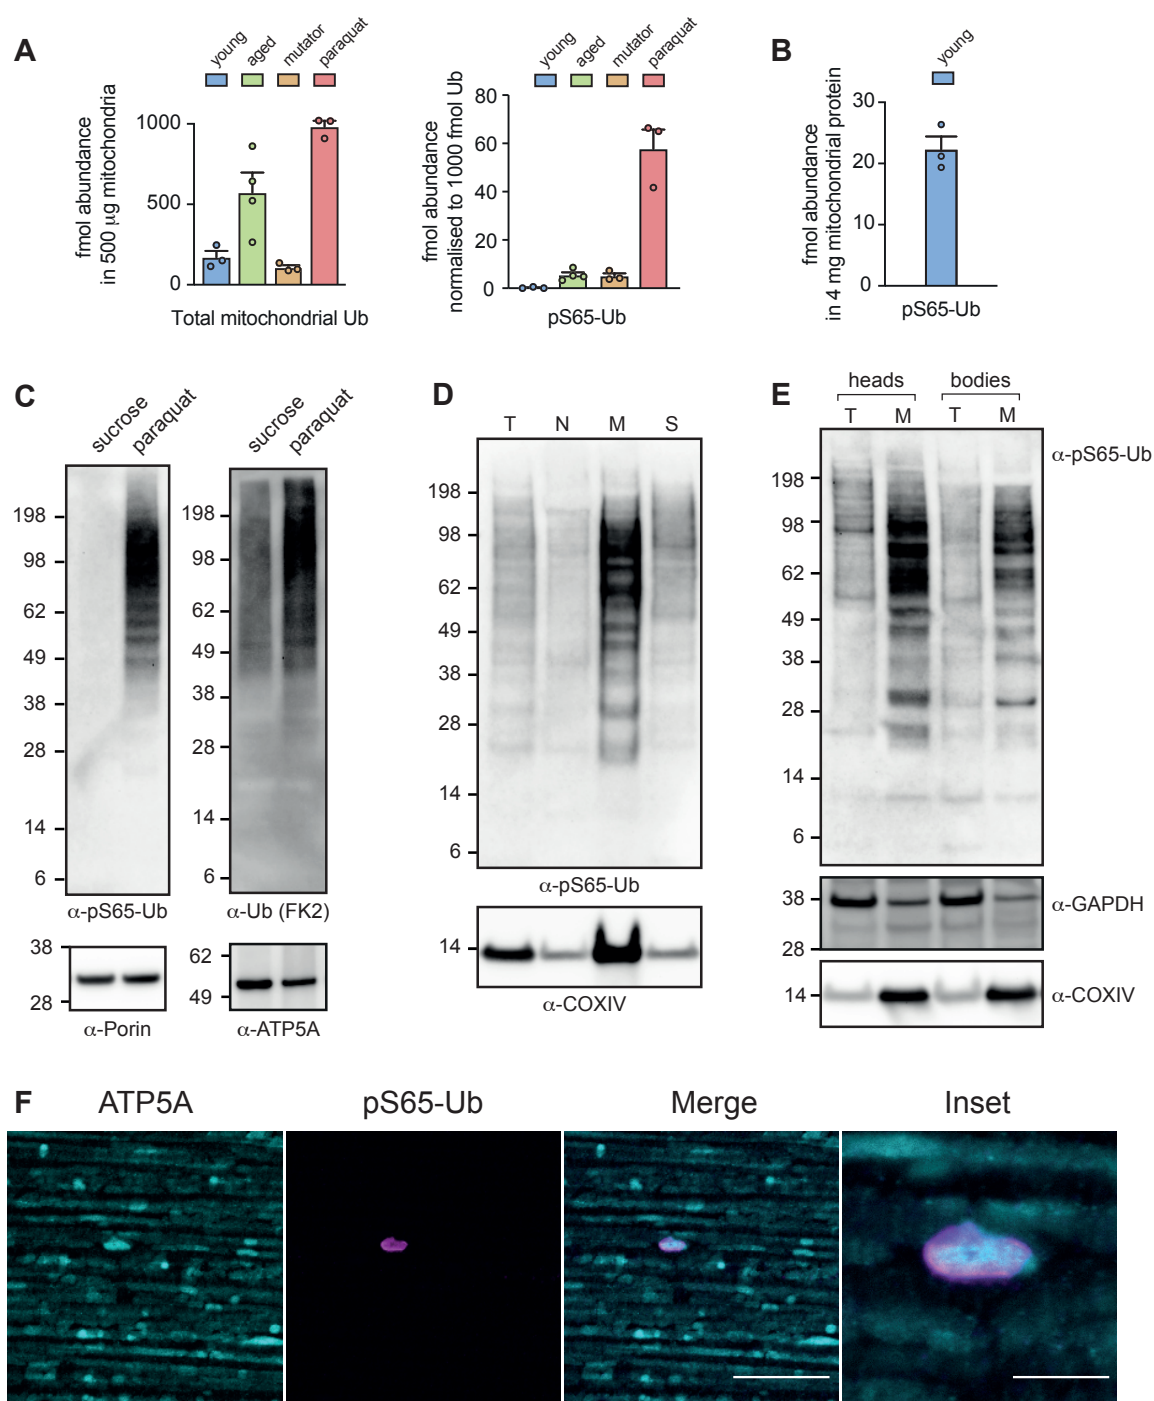

676 **Figure 1: Detection of pS65-Ub *in vivo*.** (A) Total Ub (left) and normalised pS65-Ub  
677 abundance (right) in 500  $\mu$ g Ub-Clippase-treated, TUBE-enriched mitochondrial  
678 fractions from young (2-3 days) and aged (50-60 days) wild-type flies, an mtDNA  
679 mutator model (*daG4>UAS-mito-APOBEC1*), and wild-type flies that had been  
680 exposed to paraquat (5 mM) for 3 days. (B) Absolute abundance of pS65-Ub in 4 mg  
681 mitochondria from young (2-3 days) wild-type flies following sodium carbonate  
682 extraction, Ub-Clippase treatment and phospho-peptide enrichment. Charts show  
683 mean  $\pm$  SEM, n = 3-4 independent biological replicates as shown. (C) pS65-Ub (left)  
684 and total Ub (right) immunoblots of mitochondria-enriched fractions from wild-type flies  
685 treated 3 days with either paraquat or vehicle (sucrose). (D) pS65-Ub immunoblot  
686 following subcellular fractionation of flies treated with paraquat for 3 days. T, total  
687 lysate; N, nuclear-enriched fraction; M, mitochondria-enriched fraction; S, post-  
688 mitochondrial supernatant. (E) pS65-Ub immunoblot following mechanical separation  
689 of fly heads from bodies (thoraces and abdomens). (F) Representative image of flight  
690 muscles from aged (50-day-old) wild-type animals immunostained with the indicated  
691 antibodies. Scale bars = 20  $\mu$ m (inset, 5  $\mu$ m).

692

693

## Figure 2

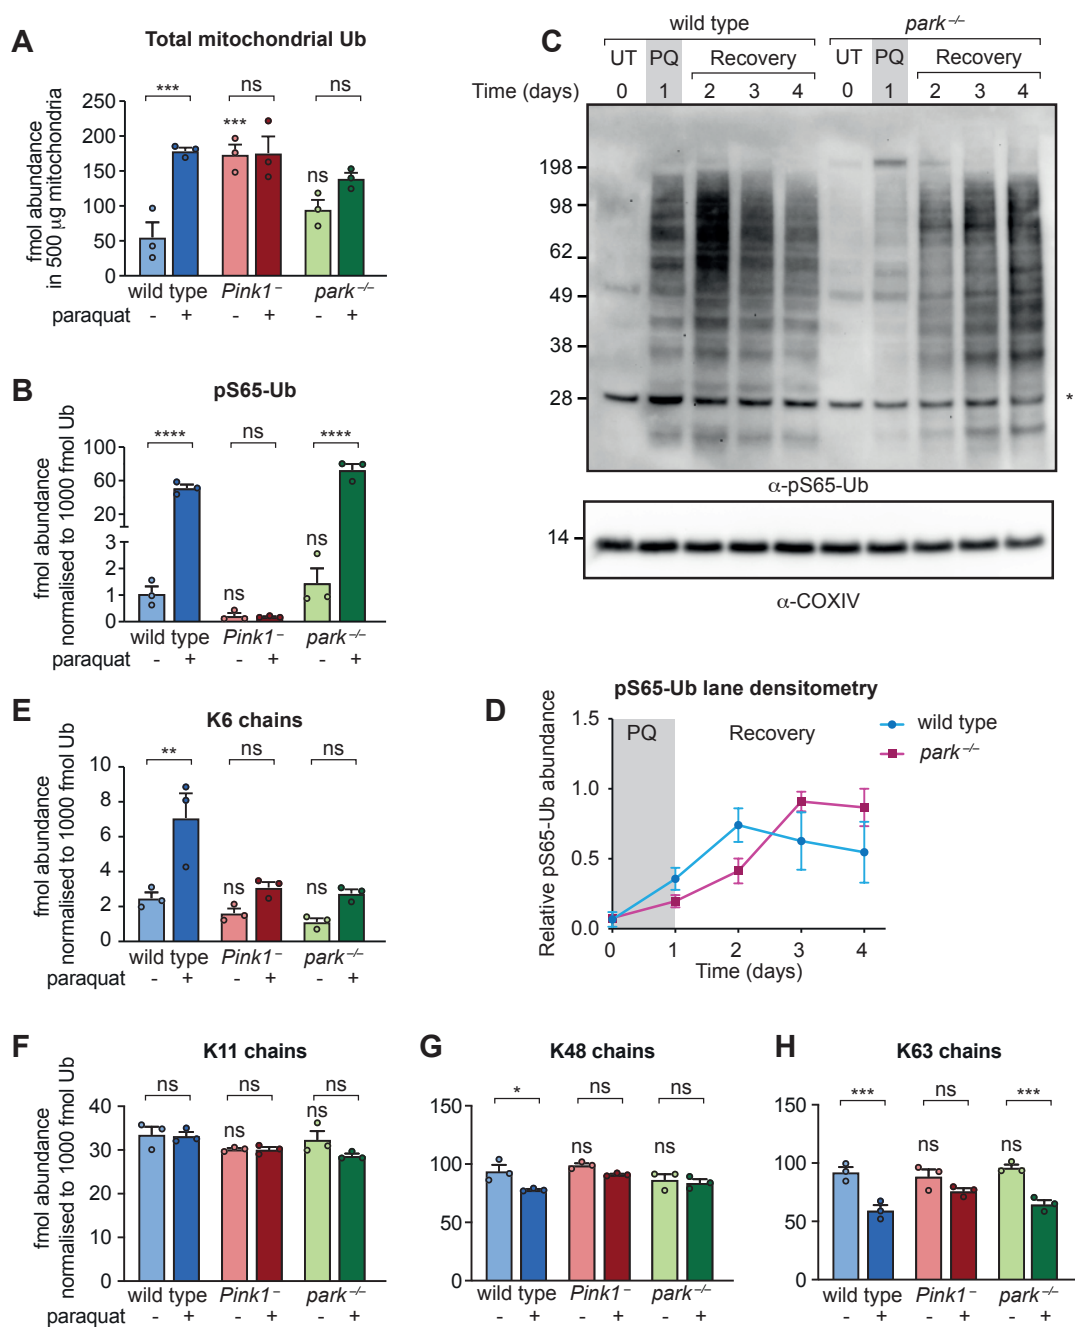



694 **Figure 2: Analysis of the paraquat-induced mitochondrial ubiquitome from**  
695 ***Pink1*<sup>-</sup> and *park*<sup>-</sup> flies.** (A) total Ub and (B) normalised pS65-Ub abundance in 500  
696 µg TUBE-enriched, Ub-Clippase-treated mitochondrial fractions from wild-type, *Pink1*<sup>-</sup>  
697 and *park*<sup>-</sup> flies, either untreated young flies (2-3 days) or exposed to paraquat for 3  
698 days. (C) pS65-Ub immunoblot of mitochondria-enriched fractions following the  
699 paraquat pulse-chase assay in wild-type and *park*<sup>-</sup> flies. UT, untreated; PQ, 1-day  
700 paraquat treatment; Recovery, flies removed from paraquat and returned to normal  
701 food. \* = non-specific band. (D) pS65-Ub lane densitometry analysis of n = 3  
702 independent replicates from (C), expressed relative to the most intense lane signal in  
703 each blot. Charts show mean +/- SEM. (E-H) Relative abundance of (E) K6 chains,  
704 (F) K11 chains, (G) K48 chains, and (H) K63 chains in mitochondrial fractions treated  
705 as in A, normalised to the total mitochondrial Ub in each sample. Charts show mean  
706 +/- SEM from n = 3 independent biological replicates. Statistical analysis used one-  
707 way ANOVA with Šidák's correction for multiple comparisons. \*  $P < 0.05$ ; \*\*  $P < 0.01$ ;  
708 \*\*\*  $P < 0.001$ ; \*\*\*\*  $P < 0.0001$ , ns = non-significant. The full list of multiplicity-adjusted  
709  $P$  values is presented in Supplementary Table 1.  
710  
711

## Figure 3

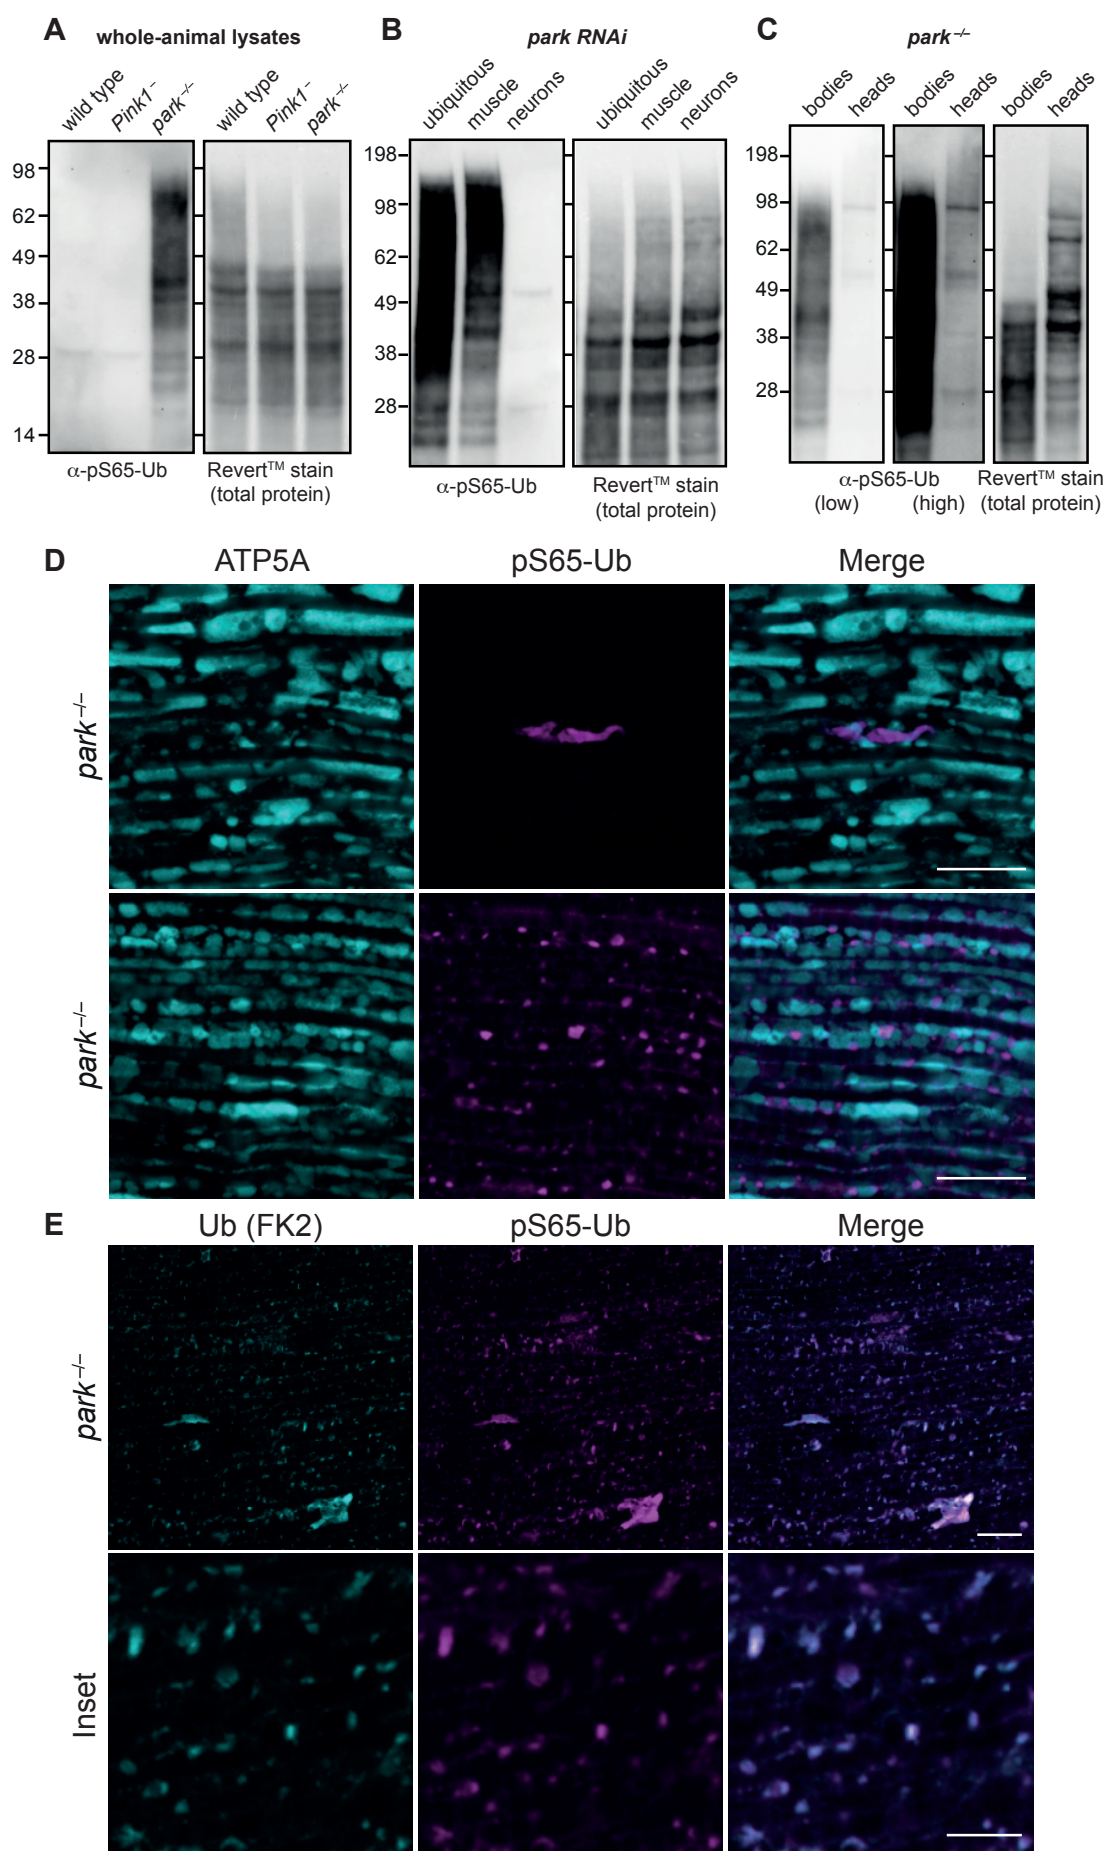

712 **Figure 3: Loss of parkin affects both production and turnover of pS65-Ub.** (A-B)  
713 pS65-Ub immunoblot of whole-animal lysates from untreated flies of the indicated  
714 genotypes. *park* RNAi was induced by *da-GAL4* (ubiquitous), *Mef2-GAL4* (muscle) or  
715 *nSyb-GAL4* (neurons). (C) pS65-Ub immunoblot of lysates from bodies or heads (as  
716 indicated) from *park*<sup>-/-</sup> animals. (D) Flight muscles from approximately 3-day-old  
717 untreated *park*<sup>-/-</sup> flies immunostained for ATP5A (IMM) and pS65-Ub. Scale bars = 10  
718 μm. (E) Flight muscles from approximately 3-day-old untreated *park*<sup>-/-</sup> flies  
719 immunostained for conjugated Ub (FK2) and pS65-Ub. Scale bars = 10 μm (top) and  
720 5 μm (bottom).  
721  
722

## Figure 4

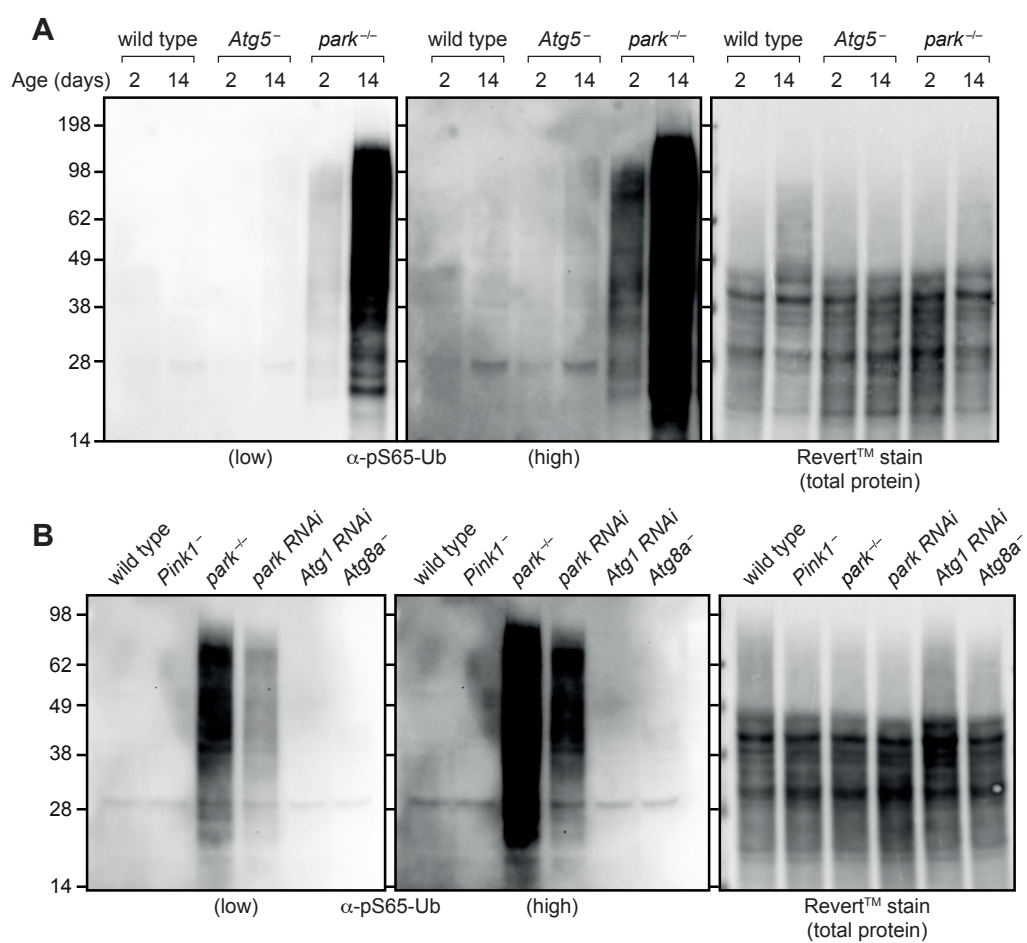

723 **Figure 4: Loss of Atgs does not lead to the same degree of pS65-Ub**  
724 **accumulation as loss of parkin.** (A) pS65-Ub immunoblot of whole-animal lysates  
725 from wild-type, *Atg5*<sup>-</sup> and *park*<sup>-/-</sup> animals harvested at the indicated ages. (B) pS65-  
726 Ub immunoblot of whole-animal lysates from young animals of the following  
727 genotypes: wild-type, *Pink1*<sup>-</sup>, *park*<sup>-/-</sup>, *park RNAi* (*daG4>UAS-park RNAi*), *Atg1 RNAi*  
728 (*daG4>UAS-Atg1 RNAi*), *Atg8a*<sup>-</sup>.  
729  
730

## Figure 5

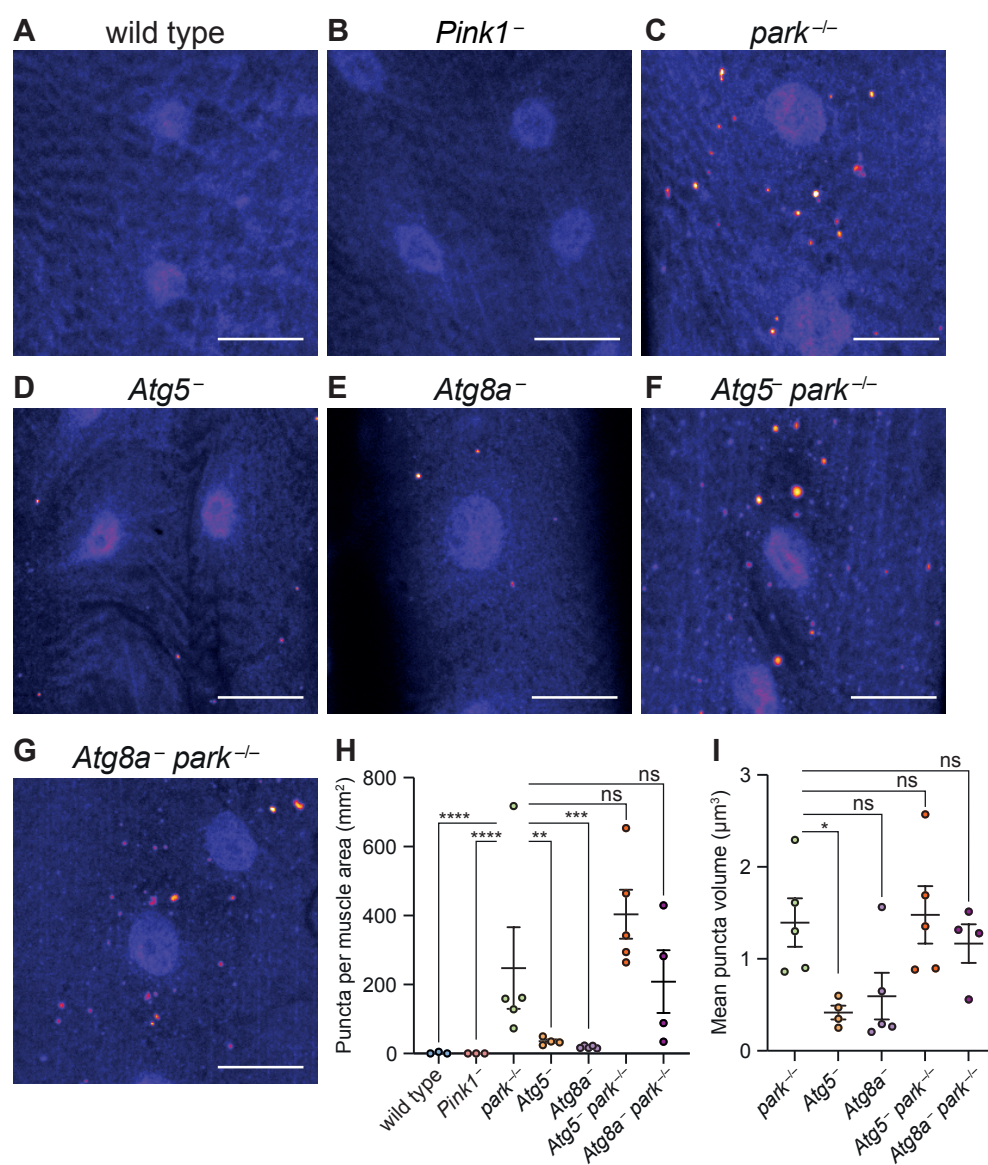

731 **Figure 5: pS65-Ub immunostaining of larval muscle.** (A-G) Representative images  
732 of pS65-Ub immunostaining false-coloured for intensity (Fire LUT) in muscle segments  
733 6-7 from wandering L3 larvae of the following genotypes: (A) wild type, (B) *Pink1*<sup>-</sup>, (C)  
734 *park*<sup>-</sup>, (D) *Atg5*<sup>-</sup>, (E) *Atg8a*<sup>-</sup>, (F) *Atg5*<sup>-</sup>; *park*<sup>-</sup>, (G) *Atg8a*<sup>-</sup>; *park*<sup>-</sup>. Scale bar = 20  
735  $\mu$ m. (H) Quantification of number of pS65-Ub puncta from A-G displaying mean +/-  
736 SEM from the indicated number of animals (n = 3-5 as indicated). (I) Puncta volume  
737 from C-G expressed as mean +/- SEM (n = 4-5 animals). Statistical analysis used one-  
738 way ANOVA with Dunnett's correction for multiple comparisons. \*  $P < 0.05$ ; \*\*  $P <$   
739  $0.01$ ; \*\*\*  $P < 0.001$ ; \*\*\*\*  $P < 0.0001$ , ns = non-significant.  
740  
741

## Figure 6

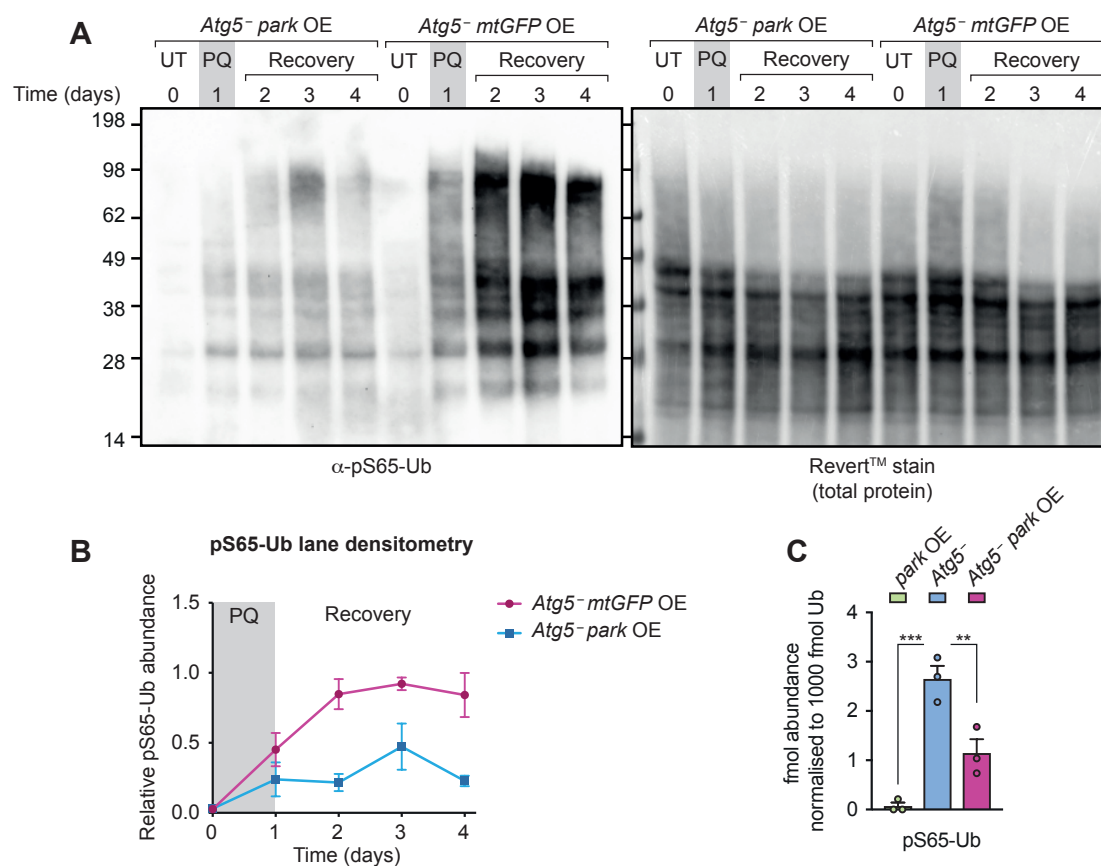



742 **Figure 6: Parkin overexpression reduces pS65-Ub levels in an *Atg5*<sup>-</sup>**  
743 **background.** (A) pS65-Ub immunoblot of whole-animal lysates following paraquat  
744 pulse-chase assay of *Atg5*<sup>-</sup> flies overexpressing parkin (*Atg5*<sup>5cc5</sup> *daG4>UAS-park*)  
745 compared with *Atg5*<sup>-</sup> flies overexpressing mitochondrially targeted GFP (*Atg5*<sup>5cc5</sup>  
746 *daG4>UAS-mito-HA-GFP*). UT, untreated flies; PQ, 1-day paraquat treatment;  
747 Recovery, flies removed from paraquat and returned to normal food. (B) pS65-Ub lane  
748 densitometry, normalised to total protein (Revert™ stain), of n = 3 independent  
749 replicates of (A), expressed as pS65-Ub intensity relative to the most intense band in  
750 each blot. Charts show mean +/- SEM. (C) Mass spectrometry analysis of normalised  
751 pS65-Ub levels in Ub-Clippase-treated, TUBE-enriched mitochondrial fractions from  
752 flies overexpressing parkin (*daG4>UAS-park*), *Atg5*<sup>-</sup> flies and *Atg5*<sup>-</sup> flies  
753 overexpressing parkin (*Atg5*<sup>5cc5</sup> *daG4>UAS-park*). Charts show mean +/- SEM.  
754 Statistical analysis used One-way ANOVA with Dunnett's correction for multiple  
755 comparisons. \*\*  $P < 0.01$ ; \*\*\*  $P < 0.001$ .  
756  
757  
758

## Supplementary Figure 1

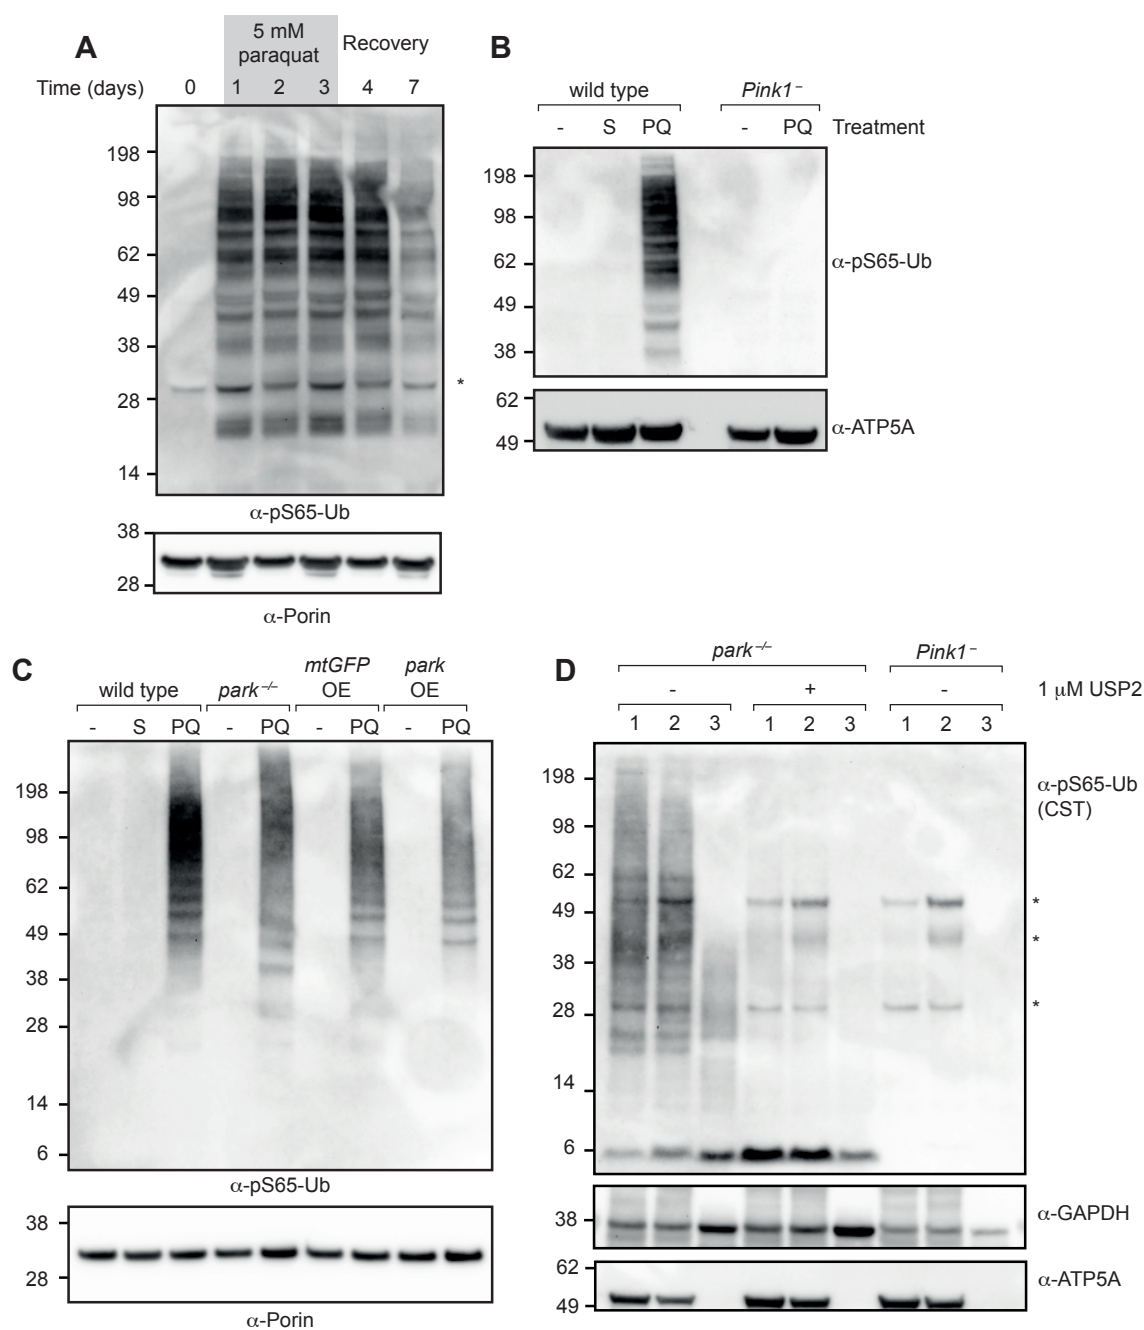

759 **Supplementary Figure 1:** (A) pS65-Ub immunoblot of mitochondria-enriched  
760 fractions from wild-type flies treated for the indicated number of days with paraquat.  
761 Recovery, return to normal food. (B) pS65-Ub immunoblot of mitochondrial fractions  
762 from wild-type and *Pink1*<sup>-</sup> flies following either no treatment (-) or after treatment for 3  
763 days with sucrose (S) or paraquat (PQ). (C) pS65-Ub immunoblot of mitochondria-  
764 enriched fractions of the following genotypes: wild type, *park*<sup>-/-</sup>, mtGFP  
765 overexpression (*daG4>UAS-mito-HA-GFP*), parkin overexpression (*daG4>UAS-*  
766 *park*). Note that lanes 2 and 3 are shown in Figure 1C. (D) pS65-Ub immunoblot  
767 following subcellular fractionation and USP2 treatment as indicated. 1, 10,000 x g  
768 pellet; 2, 21,000 x g pellet; 3, 21,000 x g supernatant. \* = non-specific bands.  
769  
770

## Supplementary Figure 2

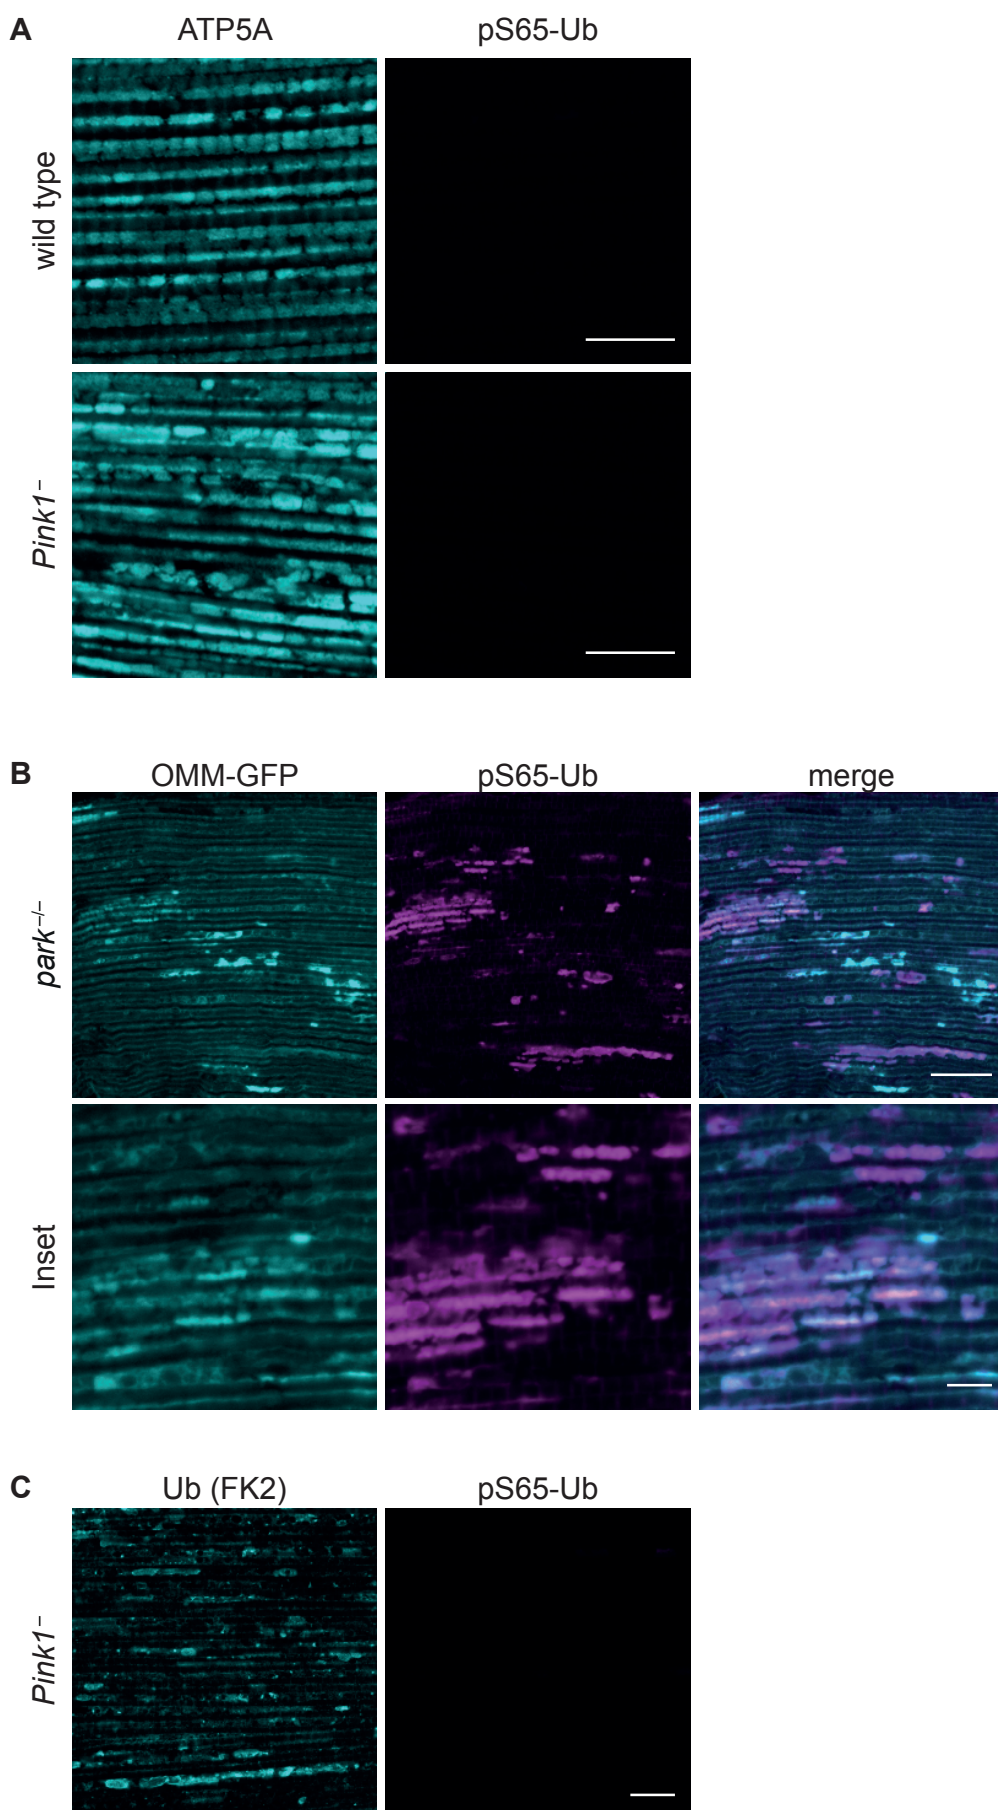

771 **Supplementary Figure 2:** (A) Immunostaining of flight muscles of *Pink1*<sup>-</sup> and wild-  
772 type flies. Note that signal acquisition, brightness and contrast settings for pS65-Ub  
773 are identical to those presented in Figure 3D. Scale bars = 10 μm. (B) pS65-Ub  
774 immunostaining (AlexaFluor 647) of flight muscles from *park*<sup>-/-</sup> flies expressing the  
775 OMM-GFP marker. Scale bars = 20 μm (inset 5 μm). (C) Flight muscles from young  
776 *Pink1*<sup>-</sup> flies, co-stained with Ub (FK2) and pS65-Ub. Scale bar = 10 μm.  
777  
778

## Supplementary Figure 3

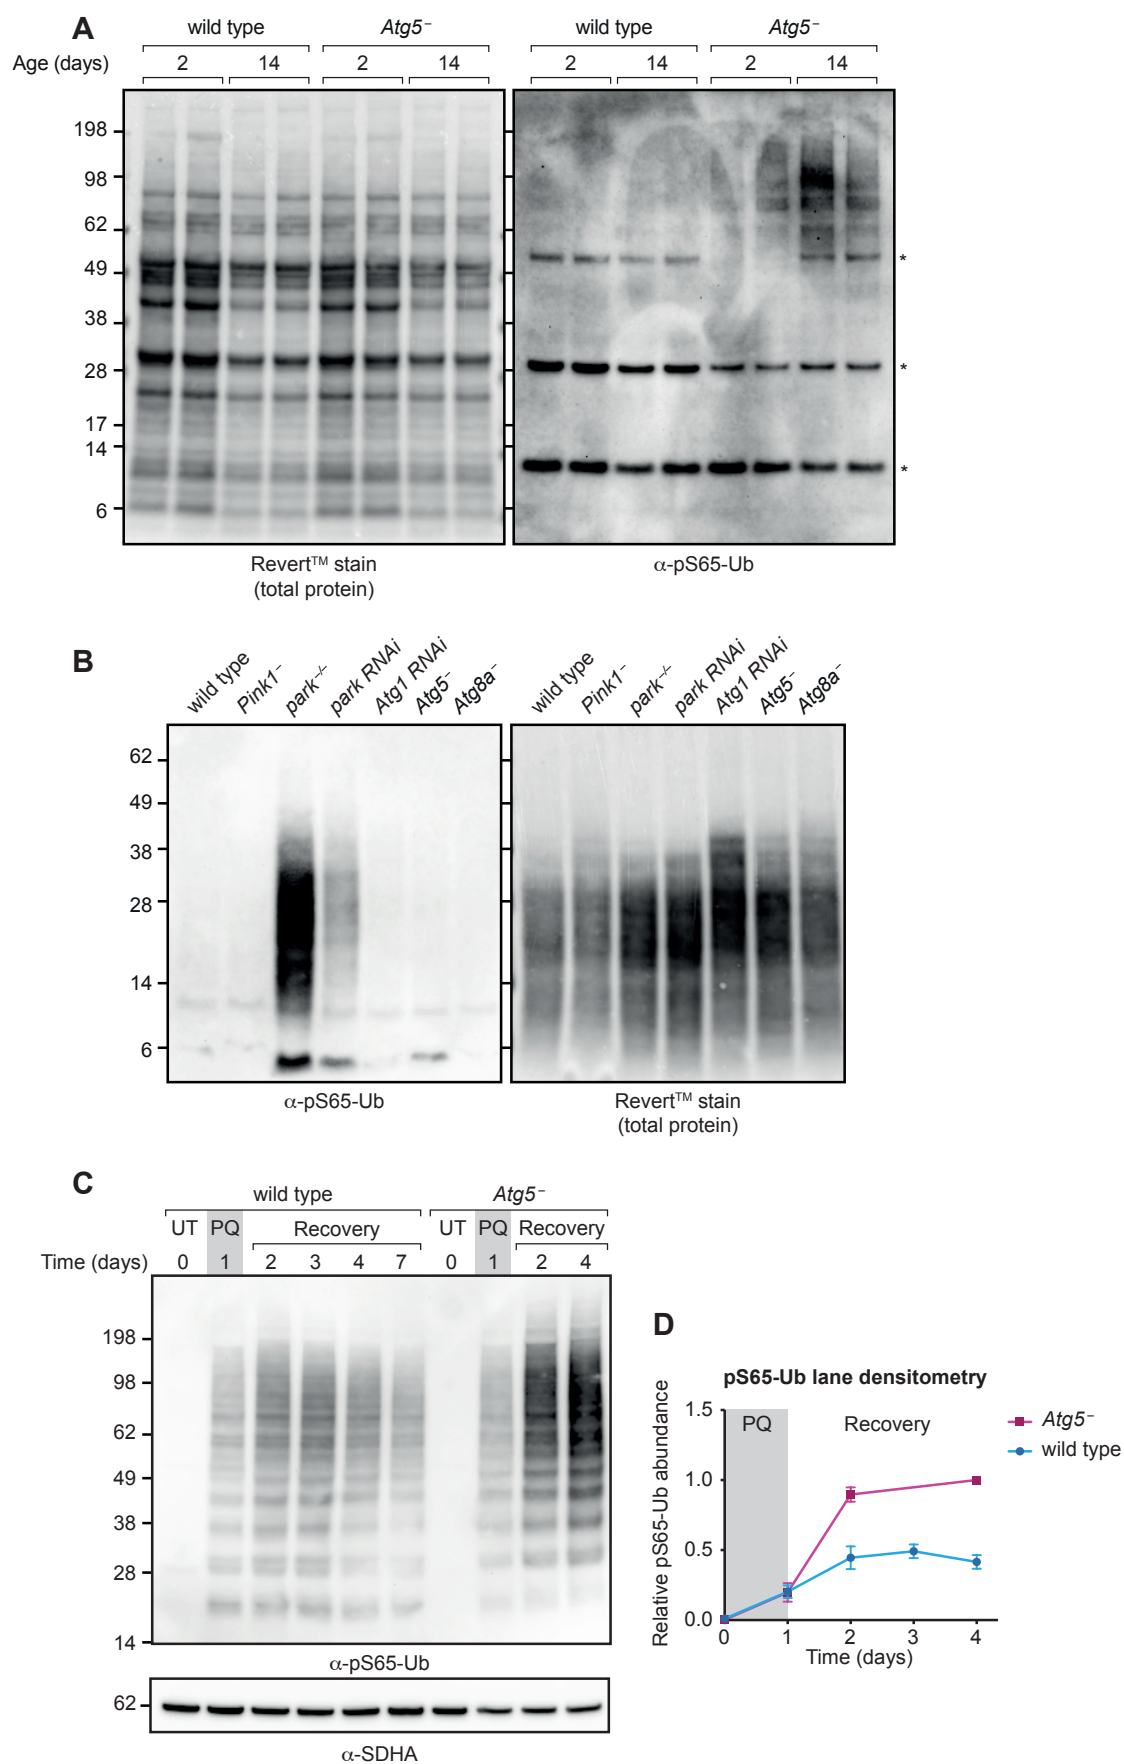

779 **Supplementary Figure 3:** (A) pS65-Ub immunoblot of mitochondrial fractions from  
780 wild-type and *Atg5*<sup>-</sup> flies harvested at the indicated ages. \* = non-specific band. (B)  
781 pS65-Ub immunoblotting in whole-animal lysates from wandering L3 larvae of the  
782 indicated genotypes. (C) pS65-Ub immunoblot of mitochondrial fractions from wild-  
783 type and *Atg5*<sup>-</sup> flies following a paraquat (PQ) pulse-chase assay. UT, untreated;  
784 Recovery, return to normal food. (D) Quantification of pS65-Ub lane densitometry from  
785 n = 3 independent replicates of (B), expressed relative to the most intense band in  
786 each blot. Charts show mean +/- SEM.  
787  
788
